1 **Transcriptome-wide map of m<sup>6</sup>A circRNAs identified in hypoxic pulmonary**  
2 **hypertension rat model**

3 **Short title: m<sup>6</sup>A circRNAs in hypoxic pulmonary hypertension**

4

5 Hua Su<sup>1,#</sup>, Lin Zhou<sup>2,#</sup>, Na Li<sup>1</sup>, Guowen Wang<sup>1</sup>, Lingfang Wu<sup>1</sup>, Xiuqing Ma<sup>1</sup>, Kejing  
6 Ying<sup>1,\*</sup> and Ruifeng Zhang<sup>1,\*</sup>

7

8 <sup>1</sup>Department of Respiratory medicine, Sir Run Run Shaw Hospital, Zhejiang University  
9 School of Medicine, 3 East Qingchun Road, Hangzhou, China.

10 <sup>2</sup>Department of Gastroenterology, First Affiliated Hospital of Zhengzhou University,  
11 Zhengzhou, China.

12

13 \*Correspondence: Ruifeng Zhang, e-mail: zhangruifeng@zju.edu.cn; Kejing Ying, e-  
14 mail: 3197061@zju.edu.cn.

15 #These two authors contribute equally to this work.

16

17

18

19

20

21

22

23

24

25

26

27

28

29

30

31 **Abstract**

32 Hypoxic pulmonary hypertension (HPH) is a lethal disease. CircRNAs and m<sup>6</sup>A  
33 circRNAs have been reported to be associated with cancer progression, but the  
34 expression profiling of m<sup>6</sup>A circRNAs has not been identified in HPH. This study was  
35 to investigate the transcriptome-wide map of m<sup>6</sup>A circRNAs in HPH. In this study,  
36 hypoxia-induced PH rat model was established. Total RNA was extracted and purified  
37 from lungs of rats, then circRNAs were detected and annotated by RNA-seq analysis.  
38 m<sup>6</sup>A RNA Immunoprecipitation (MeRIP) was performed following rRNA depletion,  
39 and RNA-seq library was constructed. CircRNA–miRNA–mRNA co-expression  
40 network was also constructed. In vitro, total m<sup>6</sup>A was measured. m<sup>6</sup>A circXpo6 and  
41 m<sup>6</sup>A circTmtc3 were detected in pulmonary artery smooth muscle cells (PASMCs) and  
42 pulmonary artery endothelial cells (PAECs) exposed to 21% O<sub>2</sub> and 1% O<sub>2</sub> for 48 h,  
43 respectively. m<sup>6</sup>A abundance in 166 circRNAs was significantly upregulated and m<sup>6</sup>A  
44 abundance in 191 circRNAs was significantly downregulated in lungs of HPH rats.  
45 m<sup>6</sup>A abundance in circRNAs was significantly reduced in hypoxia *in vitro*. m<sup>6</sup>A  
46 circRNAs were mainly derived from single exons of protein-coding genes. m<sup>6</sup>A  
47 influenced the circRNA–miRNA–mRNA co-expression network in hypoxia. m<sup>6</sup>A  
48 circXpo6 and m<sup>6</sup>A circTmtc3 were downregulated in hypoxia. In general, our study  
49 firstly identified the transcriptome-wide map of m<sup>6</sup>A circRNAs in HPH. m<sup>6</sup>A level in  
50 circRNAs was decreased in lungs of HPH rats and in PASMCs and PAECs exposed to  
51 hypoxia. Downregulated or upregulated m<sup>6</sup>A level influenced circRNA–miRNA–  
52 mRNA co-expression network in HPH. Moreover, we firstly identified two  
53 downregulated m<sup>6</sup>A circRNAs in HPH: circXpo6 and circTmtc3. We suggested that  
54 m<sup>6</sup>A circRNAs may be used as a potential diagnostic marker or therapy target in the  
55 future.

56

57

58

59

60

61

62 **Author summary**

63 HPH is a disease with great morbidity and mortality. It is often caused by chronic  
64 hypoxic lung diseases, such as chronic obstructive pulmonary disease and interstitial  
65 lung diseases. It lacks effective therapy methods so far. CircRNAs are a type of non-  
66 coding RNAs and can be used as biomarkers because they are differentially enriched in  
67 specific cell types or tissues and not easily degraded. m<sup>6</sup>A is identified as the most  
68 universal modification on non-coding RNAs in eukaryotes. CircRNAs can be modified  
69 by m<sup>6</sup>A. m<sup>6</sup>A circRNAs in HPH is not well understood yet. Here we identify the  
70 transcriptome-wide map of m<sup>6</sup>A circRNAs in HPH. We elucidate that m<sup>6</sup>A level in  
71 circRNAs is decreased in lungs of HPH rats and in PSMCs and PAECs exposed to  
72 hypoxia. We find that downregulated or upregulated m<sup>6</sup>A level influences circRNA–  
73 miRNA–mRNA co-expression network in HPH. Moreover, we are the first to identify  
74 two downregulated m<sup>6</sup>A circRNAs in HPH: circXpo6 and circTmtc3. We suggest that  
75 m<sup>6</sup>A circRNAs may be used as a potential diagnostic marker or therapy target in the  
76 future.

77

78

79

80

81

82

83

84

85

86

87

88

89

90

91

92

### 93 **Introduction**

94 Pulmonary hypertension (PH) is a lethal disease and defined as an increase in the mean  
95 pulmonary arterial pressure  $\geq 25$  mmHg at rest, as measured by right heart  
96 catheterization (1). Hypoxic pulmonary hypertension (HPH) belongs to group III PH  
97 according to the comprehensive clinical classification of PH, normally accompanied by  
98 severe chronic obstructive pulmonary disease (COPD) and interstitial lung diseases (2).  
99 HPH is a progressive disease induced by chronic hypoxia (CH) (1). CH triggers over-  
100 proliferation of pulmonary artery endothelial cells (PAECs) and pulmonary artery  
101 smooth muscle cells (PASMCs), and activation of quiescent fibroblasts, the hallmark  
102 of HPH (1, 3). The pathological characteristics of HPH are pulmonary vascular  
103 remodeling, pulmonary hypertension, and right ventricular hypertrophy (RVH) (4). So  
104 far there is no effective therapy for HPH (2). More effective therapeutic targets are  
105 needed to be discovered.

106

107 Circular RNAs (circRNAs) were firstly found abundant in eukaryotes using RNA-seq  
108 approach (5-7). Pre-mRNA is spliced with the 5' and 3' ends, forming a 'head-to-tail'  
109 splice junction, then circRNAs are occurred (5). According to the genome origin,  
110 circRNAs may be classified into four different subtypes: exonic circRNA (ecircRNA),  
111 intronic circRNA (ciRNA), exon-intron circRNA (EIciRNA) and tRNA introns  
112 circRNA (tricRNA) (5). CircRNAs are reported to play crucial roles in miRNA binding,  
113 protein binding, regulation of transcription, and post-transcription (5, 8). Recent reports  
114 indicated that circRNAs can translate to proteins (8, 9). Moreover, circRNAs are widely  
115 expressed in human umbilical venous endothelial cells when stimulated by hypoxia (10,  
116 11). Up to date, only a few reports mentioned PH-associated circRNAs. CircRNAs  
117 expression profile is demonstrated in HPH and chronic thromboembolic pulmonary  
118 hypertension (12). However, it is still unknown that the post-transcript modification of  
119 circRNAs in HPH.

120

121 N<sup>6</sup>-methyladenosine (m<sup>6</sup>A) is regarded as one part of “epitranscriptomics” and  
122 identified as the most universal modification on mRNAs and noncoding RNAs  
123 (ncRNAs) in eukaryotes (13, 14). DRm<sup>6</sup>ACH (D denotes A, U or G; R denotes A, G;  
124 H denotes A, C, or U) is a consensus motif occurred in m<sup>6</sup>A modified RNAs (15-17).  
125 m<sup>6</sup>A modification is mainly enriched around the stop codons, at 3’ untranslated regions  
126 (3’ UTRs) and within internal long exons (17-19). Several catalyzed molecules act as  
127 “writers”, “readers”, and “erasers” to regulate the m<sup>6</sup>A modification status (14). The  
128 methyltransferase complex is known as writers, including methyltransferase-like-3, -14  
129 and -16 (METTL3/METTL14/METTL16), Wilms tumour 1-associated protein  
130 (WTAP), RNA binding motif protein 15 (RBM15), vir like m<sup>6</sup>A methyltransferase  
131 associated (KIAA1429) and zinc finger CCCH-type containing 13 (ZC3H13),  
132 appending m<sup>6</sup>A on DRACH (17, 20, 21). METTL3 is regarded as the core catalytically  
133 active subunit, while METTL14 and WTAP play a structural role in METTL3’s  
134 catalytic activity (18, 22). The “erasers”, fat mass and obesity related protein (FTO)  
135 and alkylation repair homolog 5 (ALKBH5), catalyze the N-alkylated nucleic acid  
136 bases oxidatively demethylated (22). The “readers”, the YT521-B homology (YTH)  
137 domain-containing proteins family includes YTHDF (YTHDF1, YTHDF2, YTHDF3),  
138 YTHDC1, and YTHDC2, specifically recognizes m<sup>6</sup>A and regulates splicing,  
139 localization, degradation and translation of RNAs (14, 22, 23). The YTHDF1 and  
140 YTHDF2 crystal structures forms an aromatic cage to recognize m<sup>6</sup>A sites in cytoplasm  
141 (24). YTHDC1 is the nuclear reader and YTHDC2 binds m<sup>6</sup>A under specific  
142 circumstances or cell types (24). Hypoxia may alter the balance of writers-erasers-  
143 readers and induce tumor growth, angiogenesis, and progression (25, 26).

144

145 Interestingly, circRNAs can be m<sup>6</sup>A-modified. m<sup>6</sup>A circRNAs displayed cell-type-  
146 specific methylation patterns in human embryonic stem cells (hESCs) and HeLa cells  
147 (14). CircRNAs contained m<sup>6</sup>A modifications are likely to promote protein translation  
148 in a cap-independent pattern (9). However, m<sup>6</sup>A circRNAs has not been elucidated in  
149 HPH yet. Here we are the first to identify the correlation between m<sup>6</sup>A modification  
150 and circRNAs abundance in HPH.

151

## 152 **Results**

### 153 **m<sup>6</sup>A level of circRNAs was reduced in HPH rats and most circRNAs contained** 154 **one m<sup>6</sup>A peak**

155 3 weeks treatment by hypoxia resulted in right ventricular systolic pressure (RVSP)  
156 elevating to  $42.23 \pm 1.96$  mmHg compared with  $27.73 \pm 1.71$  mmHg in the control ( $p$   
157  $< 0.001$ , **Fig 1A and 1B**). RVH was indicated by the increase of the ratio of the right  
158 ventricle (RV), left ventricular plus ventricular septum (LV + S) [RV/ (LV + S)]  
159 compared with the control ( $0.25 \pm 0.03$  vs.  $0.44 \pm 0.04$ ,  $p = 0.001$ , **Fig 1C**). The medial  
160 wall of the pulmonary small arteries was also significantly thickened ( $19.28 \pm 2.19\%$   
161 vs.  $39.26 \pm 5.83\%$ ,  $p < 0.001$ , **Fig 1D and 1E**). Moreover, in the normoxia group,  $53.82$   
162  $\pm 3.27\%$  of the arterioles were non-muscularized (NM) vessels, and  $25.13 \pm 1.83\%$   
163 were fully muscularized (FM) vessels. In contrast, partially muscularized vessels (PM)  
164 and FM vessels showed a greater proportion ( $32.88 \pm 3.15\%$  and  $41.41 \pm 3.35\%$ ) in  
165 HPH rats, while NM vessels occupied a lower proportion ( $25.71 \pm 2.55\%$ ) (**Fig 1F**).  
166 **Fig 1G** displayed the heatmap of m<sup>6</sup>A circRNAs expression profiling in normoxia (N)  
167 and hypoxia (HPH). m<sup>6</sup>A abundance in 166 circRNAs was significantly upregulated.  
168 Meanwhile, m<sup>6</sup>A abundance in 191 circRNAs was significantly downregulated (**S1**  
169 **Table**, filtered by fold change  $\geq 4$  and  $p \leq 0.00001$ ). Lungs of N and HPH rats were  
170 selected to measure m<sup>6</sup>A abundance in purified circRNAs. The m<sup>6</sup>A level in total  
171 circRNAs isolated from lungs of HPH rats was lower than that from controls (**Fig 1H**).  
172 Moreover, over 50% circRNAs contained only one m<sup>6</sup>A peak either in lungs of N or  
173 HPH rats (**Fig 1I**).

174

### 175 **m<sup>6</sup>A circRNAs were mainly from protein-coding genes spanned single exons in N** 176 **and HPH groups**

177 We analyzed the distribution of the parent genes of total circRNAs, m<sup>6</sup>A-circRNAs,  
178 and non-m<sup>6</sup>A circRNAs in N and HPH, respectively. N and HPH groups showed a  
179 similar genomic distribution of m<sup>6</sup>A circRNAs and non-m<sup>6</sup>A circRNAs (**Fig 2A and**  
180 **2B**). Moreover, about 80% of m<sup>6</sup>A circRNAs and non-m<sup>6</sup>A circRNAs were derived

181 from protein-coding genes in both groups. A previous report indicated that most  
182 circRNAs originated from protein-coding genes spanned two or three exons (14). While  
183 in our study, over 50% and 40% of total circRNAs from protein-coding genes spanned  
184 one exon in N and HPH groups, respectively (**Fig 2C and 2D**). Similarly, m<sup>6</sup>A  
185 circRNAs and non-m<sup>6</sup>A circRNAs were mostly encoded by single exons. Therefore, it  
186 was indicated that m<sup>6</sup>A methylation was abundant in circRNAs originated from single  
187 exons in N and HPH groups.

188

### 189 **The distribution and functional analysis for host genes of circRNAs with** 190 **differentially expressed (DE) m<sup>6</sup>A peaks**

191 The length of DE m<sup>6</sup>A circRNAs was mostly enriched in 1-10000 bps (**Fig 3A**). The  
192 host genes of upregulated m<sup>6</sup>A circRNAs were located in chromosome 1, 2 and 10,  
193 while the downregulated parts were mostly located in chromosome 1, 2 and 14 (**Fig**  
194 **3B**).

195

196 Gene ontology (GO) analysis and Kyoto Encyclopedia of Genes and Genomes (KEGG)  
197 pathway analysis were performed to explore the host genes of circRNAs with DE m<sup>6</sup>A  
198 peaks. In the GO analysis (**Fig 3C, left**), the parent genes of circRNAs with upregulated  
199 m<sup>6</sup>A peaks were enriched in the protein modification by small protein conjugation or  
200 removal and macromolecule modification process in the biological process (BP).  
201 Organelle and membrane-bounded organelle were also the two largest parts in the  
202 cellular component (CC) analysis. Binding and ion binding were the two main  
203 molecular functions (MF). The top 10 pathways from KEGG pathway analysis were  
204 selected in the bubble chart (**Fig 3C, right**). Among them, the oxytocin signaling  
205 pathway, protein processing in endoplasmic reticulum and cGMP-PKG signaling  
206 pathway were the top 3 pathways involved. In addition, vascular smooth muscle  
207 contraction pathway was the most associated pathway in PH progression (27).

208

209 In **Fig 3D left**, the parent genes of circRNAs with downregulated m<sup>6</sup>A peaks were  
210 mainly enriched in the cellular protein modification process and protein modification

211 process in BP. Organelle and membrane-bounded organelle made up the largest  
212 proportion in the CC classification. The MF analysis was focused on receptor signaling  
213 protein activity and protein binding. The parent genes of circRNAs with decreased m<sup>6</sup>A  
214 peaks were mainly involved in the tight junction and lysine degradation in the KEGG  
215 pathway analysis (**Fig 3D, right**).

216

#### 217 **m<sup>6</sup>A level of circRNAs and circRNAs abundance were influenced by hypoxia**

218 360 m<sup>6</sup>A circRNAs were detected in N and HPH groups. 49% of circRNAs were only  
219 modified by m<sup>6</sup>A in N, and 54% of circRNAs were only modified by m<sup>6</sup>A in HPH (**Fig**  
220 **4A**). To explore whether m<sup>6</sup>A methylation would influence circRNAs expression level,  
221 expression of the 360 common m<sup>6</sup>A circRNAs were identified. More circRNAs tended  
222 to decrease in HPH compared to N (**Fig 4B**). Moreover, expression of m<sup>6</sup>A circRNAs  
223 was significantly downregulated compared with non-m<sup>6</sup>A circRNAs in hypoxia,  
224 suggesting that m<sup>6</sup>A may downregulate the expression of circRNAs in hypoxia (**Fig**  
225 **4C, p = 0.0465**).

226

#### 227 **Construction of a circRNA–miRNA–mRNA co-expression network in HPH**

228 We found 76 upregulated circRNAs with increased m<sup>6</sup>A abundance, and 107  
229 downregulated circRNAs with decreased m<sup>6</sup>A abundance (**Fig 5A, S2 Table**). As  
230 known, circRNAs were mostly regarded as a sponge for miRNAs and regulated the  
231 expression of corresponding target genes of miRNAs (28). To explore whether  
232 circRNAs with DE m<sup>6</sup>A abundance influence the availability of miRNAs to target  
233 genes, we selected DE circRNAs with increased or decreased m<sup>6</sup>A abundance. GO  
234 enrichment analysis and KEGG pathway analysis were also performed to analyze target  
235 mRNAs. Target mRNAs displayed similar GO enrichment in the two groups (**Fig 5B**  
236 **and 5C**). Two main functions were determined in BP analysis: positive regulation of  
237 biological process and localization. Intracellular and intracellular parts make up the  
238 largest proportion in CC part. Target mRNAs were mostly involved in protein binding  
239 and binding in MF part. In the KEGG pathway analysis, the top 10 most enriched  
240 pathways were selected (**Fig 5D and 5E**). Wnt and FoxO signaling pathways were



241 reported to be involved in PH progression (29-31). Then, we analyzed the target genes  
242 involved in these two pathways (**S1 Fig and S2 Fig**). SMAD4 was associated with PH  
243 and involved in Wnt signaling pathways. MAPK3, SMAD4, TGFBR1, and CDKN1B  
244 were involved in FoxO signaling pathways. To explore the influence of circRNA-  
245 miRNA regulation on PH-associated genes expression, we constructed a circRNA-  
246 miRNA-mRNA network, integrating matched expression profiles of circRNAs,  
247 miRNAs and mRNAs (**Fig 5F and 5G**). MicroRNAs sponged by the target genes of  
248 interest were analyzed. MiR-125a-3p, miR-23a-5p, miR-98-5p, let-7b-5p, let-7a-5p,  
249 let-7g-5p, and miR-205 were analyzed because they were reported to be associated with  
250 PH (32, 33). We filtered the key mRNAs and miRNAs, and founded that the two  
251 circRNAs were the most enriched, which were originated from chr1:204520403-  
252 204533534- (Xpo6) and chr7:40223440-40237400- (Tmtc3).

253

#### 254 **m<sup>6</sup>A circXpo6 and m<sup>6</sup>A circTmtc3 were downregulated in PSMCs and PAECs** 255 **in hypoxia**

256 m<sup>6</sup>A abundance was significantly reduced in PSMCs and PAECs when exposed to  
257 hypoxia (0.107% ± 0.007 vs. 0.054% ± 0.118, p = 0.023 in PSMCs; 0.114% ± 0.011  
258 vs. 0.059% ± 0.008, p = 0.031 in PAECs, **Fig 6A**). m<sup>6</sup>A abundance in circRNAs was  
259 lower than it in mRNAs (0.1–0.4%) (17, 18). Next, we confirmed the back-splicing of  
260 circXpo6 and circTmtc3 by CIRI software. The sequence of linear Xpo6 and Tmtc3  
261 mRNA was analyzed. Then we identified that circXpo6 was spliced form exon 7, 8,  
262 and 9 of Xpo6. CircTmtc3 was spliced form exon 8, 9, 10, and 11 (**Fig 6B**). Using  
263 cDNA and genomic DNA (gDNA) from PSMCs and PAECs as templates, circXpo6  
264 and circTmtc3 were only amplified by divergent primers in cDNA, while no product  
265 was detected in gDNA (**Fig 6C**). To identify whether circXpo6 and circTmtc3 were  
266 modified by m<sup>6</sup>A, we performed m<sup>6</sup>A RNA Immunoprecipitation (MeRIP)-RT-PCR  
267 and MeRIP quantitative RT-PCR (MeRIP-qRT-PCR) to detect the expression of  
268 circXpo6 and circTmtc3 (**Fig 6D and 6E**). m<sup>6</sup>A circXpo6 and m<sup>6</sup>A circTmtc3 were  
269 significantly decreased in PSMCs and PAECs when exposed to hypoxia (p = 0.002,  
270 and p = 0.015 in PSMCs and p = 0.02, and p = 0.047 in PAECs)

271

## 272 **Discussion**

273 In this study, we identified the transcriptome-wide map of m<sup>6</sup>A circRNAs in hypoxic  
274 pulmonary hypertension. On the whole, we found that m<sup>6</sup>A level in circRNAs was  
275 reduced in lungs when exposed to hypoxia. m<sup>6</sup>A circRNAs were mainly derived from  
276 single exons of protein-coding genes in N and HPH. m<sup>6</sup>A abundance in circRNAs was  
277 downregulated in hypoxia *in vitro*. m<sup>6</sup>A influenced the circRNA–miRNA–mRNA co-  
278 expression network in hypoxia. Moreover, circXpo6 and circTmtc3 were the novel  
279 identified circRNAs modified by m<sup>6</sup>A in hypoxic pulmonary hypertension.

280

281 m<sup>6</sup>A plays important roles in various biological processes. m<sup>6</sup>A is associated with  
282 cancer progression, promoting the proliferation of cancer cells and contributing to the  
283 cancer stem cell self-renewal (18, 21). Lipid accumulation was reduced in hepatic cells  
284 when m<sup>6</sup>A abundance in peroxisome proliferator-activator (*PPaR*) was decreased (34).  
285 Enhanced m<sup>6</sup>A level of mRNA contributed to compensated cardiac hypertrophy (35).  
286 Also, m<sup>6</sup>A modification of lincRNA 1281 was necessary for mESC differentiation (36).

287

288 Although it has been reported that m<sup>6</sup>A mRNAs were influenced by hypoxia, there is  
289 no report about m<sup>6</sup>A circRNAs in HPH yet. Up to now, no consistent conclusion was  
290 reached about the link between m<sup>6</sup>A and hypoxia. Previous reports found that the m<sup>6</sup>A  
291 abundance in mRNA was increased under hypoxia stress in HEK293T cells and  
292 cardiomyocytes (37, 38). The increased m<sup>6</sup>A level stabilized the mRNAs of Glucose  
293 Transporter 1 (Glut1), Myc proto-oncogene bHLH transcription factor (Myc), Dual  
294 Specificity Protein Phosphatase 1 (Dusp1), Hairy and Enhancer of Split 1 (Hes1), and  
295 Jun Proto-Oncogene AP-1 Transcription Factor Subunit (Jun) without influencing their  
296 protein level (37). In contrast, another reported that m<sup>6</sup>A level of total mRNA was  
297 decreased when human breast cancer cell lines were exposed to 1% O<sub>2</sub> (26). Hypoxia  
298 increased demethylation by stimulating hypoxia-inducible factor (HIF)-1 $\alpha$ - and HIF-  
299 2 $\alpha$ -dependent over-expression of ALKBH5 (26). In addition, transcription factor EB  
300 activates the transcription of ALKBH5 and downregulates the stability of METTL3

301 mRNA in hypoxia/reoxygenation (H/R)-induced autophagy in ischemic diseases (38).  
302 Our study found that m<sup>6</sup>A abundance in total circRNAs was decreased by hypoxia  
303 exposure. Moreover, our study indicated that circXpo6 and circTmtc3 were the novel  
304 identified circRNAs modified by m<sup>6</sup>A in HPH. m<sup>6</sup>A abundance in circXpo6 and  
305 circTmtc3 was decreased in hypoxia. It is probably because of HIF-dependent and  
306 ALKBH5-mediated m<sup>6</sup>A demethylation (26).

307

308 Previous reports indicated that m<sup>6</sup>A methylation close to 3'UTR and stop codon of  
309 mRNA is inversely correlated with gene expression (14, 39). Low m<sup>6</sup>A level is  
310 negatively associated with circRNAs expression, while high m<sup>6</sup>A level is not linked to  
311 circRNAs expression in hESCs and HeLa cells (14). Consistent with the previous  
312 reports (14, 39), our study found that m<sup>6</sup>A reduced the total circRNAs abundance in  
313 hypoxia. Surprisingly, the expression of circXpo6 and circTmtc3 was decreased with  
314 the downregulated m<sup>6</sup>A level. No associated reports could confirm this phenomenon  
315 yet. Therefore, we suspected that m<sup>6</sup>A may influence the expression of circXpo6 and  
316 circTmtc3 through other pathways. It needs further validation.

317

318 Competing endogenous RNA (ceRNA) mechanism was proposed that mRNAs,  
319 pseudogenes, lncRNAs and circRNAs interact with each other by competitive binding  
320 to miRNA response elements (MREs) (40, 41). m<sup>6</sup>A acts as a post-transcript regulation  
321 of circRNAs and influences the expression of circRNAs, thus we suggested that m<sup>6</sup>A  
322 could also regulate the circRNA–miRNA–mRNA co-expression network. When the  
323 circRNAs were classified, we found that these downstream targets regulated by  
324 circRNA–miRNA of interest were mostly enriched in PH-associated Wnt and FoxO  
325 signaling pathways (30, 31). The Wnt/β-catenin (bC) pathway and Wnt/ planar cell  
326 polarity (PCP) pathway are the two most critical Wnt signaling pathways in PH (30).  
327 As known, the two important cells associated with HPH are PSMCs and PAECs (1,  
328 3). The growth of PSMCs was increased when Wnt/bC and Wnt/PCP pathways were  
329 activated by platelet derived growth factor beta polypeptide b (PDGF-BB) (30, 42). In  
330 addition, the proliferation of PAECs was enhanced when Wnt/bC and Wnt/PCP

331 pathways were activated by bone morphogenetic protein 2 (BMP2). Furthermore, the  
332 FoxO signaling pathway is associated with the apoptosis-resistant and  
333 hyperproliferative phenotype of PSMCs (31). Reactive oxygen species (ROS) is  
334 increased by hypoxia and activates AMPK-dependent regulation of FoxO1 expression,  
335 resulting in increased expression of catalase in PSMCs (43). Our study firstly  
336 uncovered that m<sup>6</sup>A influenced the stability of circRNAs, thus affecting the binding of  
337 circRNAs and miRNA, resulting in the activation of Wnt and FoxO signaling pathways.

338

339 However, limitations still exist in the study. First, we did not analyze the m<sup>6</sup>A level  
340 between circRNAs and the host genes. Second, the exact mechanism of hypoxia  
341 influences m<sup>6</sup>A was not demonstrated. Lastly, the function of circXpo6 and circTmtc3  
342 in HPH was not elaborated.

343

344 In conclusion, our study firstly identified the transcriptome-wide map of m<sup>6</sup>A circRNAs  
345 in HPH. m<sup>6</sup>A level in circRNAs was decreased in lungs of HPH and in PSMCs and  
346 PAECs exposed to hypoxia. m<sup>6</sup>A level influenced circRNA–miRNA–mRNA co-  
347 expression network in HPH. Moreover, we firstly identified two downregulated m<sup>6</sup>A  
348 circRNAs in HPH: circXpo6 and circTmtc3. We suggest that circRNAs can be used as  
349 biomarkers because it is differentially enriched in specific cell types or tissues and not  
350 easily degraded (6). Also, the aberrant m<sup>6</sup>A methylation may contribute to tumor  
351 formation and m<sup>6</sup>A RNAs may be a potential therapy target for tumor (17). Therefore,  
352 we suppose that m<sup>6</sup>A circRNAs may also be used as a potential diagnostic marker or  
353 therapy target in HPH in the future. But more research is needed to validate this  
354 possibility.

355

## 356 **Materials and Methods**

### 357 **Hypoxia-induced PH rat model**

358 Sprague-Dawley rats (SPF, male, 180-200 g, 4 weeks) were obtained from the Animal  
359 Experimental Center of Zhejiang University, China. Rats were maintained in a  
360 normobaric normoxia (FiO<sub>2</sub> 21%) or hypoxic chamber (FiO<sub>2</sub> 10%) for 3 weeks (3, 44).

361 Rats were then isoflurane-anesthetized and sacrificed. Lung and heart tissues were  
362 removed and immediately frozen at liquid nitrogen or fixed in 4% buffered  
363 paraformaldehyde solution. All experimental procedures were conducted in line with  
364 the principles approved by the Institutional Animal Care and Use Committee of  
365 Zhejiang University.

366

### 367 **RVSP and RVH**

368 RVSP was measured as below. Rats were isoflurane-anesthetized and right ventricle  
369 catheterization was performed through the right jugular using a pressure-volume loop  
370 catheter (Millar) as the previous reports (44-46). The ratio of [RV/ (LV + S)] was used  
371 as an index of RVH.

372

### 373 **Histological analysis**

374 Lung tissues were embedded in paraffin, sectioned at 4  $\mu$ m and stained with  
375 hematoxylin and eosin (H&E) and  $\alpha$ -smooth muscle actin ( $\alpha$ -SMA, 1:100, ab124964,  
376 Abcam, USA). The ratio of pulmonary small artery wall thickness and muscularization  
377 were calculated (3).

378

### 379 **Isolation and hypoxia-treatment of PSMCs and PAECs**

380 PSMCs and PAECs were isolated using the methods according to previous reports  
381 (32, 47, 48). PSMCs and PAECs were cultured in Dulbecco's modified Eagle's  
382 medium (DMEM) supplemented with 10% fetal bovine serum (FBS) and 20% FBS for  
383 48h, respectively (32, 49). The cells were incubated in a 37°C, 21% O<sub>2</sub> or 1% O<sub>2</sub>-5%  
384 CO<sub>2</sub> humidified incubator. PSMCs at 70-80% confluence in 4 to 7 passages were  
385 used in experiments. PAECs at 80-90% confluence in 4 to 5 passages were used in  
386 experiments (50).

387

### 388 **RNA isolation and RNA-seq analysis of circRNAs**

389 Total RNA (10 mg) was obtained using TRIzol reagent (Invitrogen, Carlsbad, CA, USA)  
390 from lungs (1 g) of control and HPH rats. The extracted RNAs were purified with Rnase

391 R (RNR07250, Epicentre) digestion to remove linear transcripts. Paired-end reads were  
392 harvested from Illumina HiSeq Sequence after quality filtering. The reads were aligned  
393 to the reference genome (UCSC RN5) with STAR software. CircRNAs were detected  
394 and annotated with CIRI software(51). Raw junction reads were normalized to per  
395 million number of reads (RPM) mapped to the genome with log2 scaled.

396

### 397 **MeRIP and Library Preparation**

398 Total RNA was extracted as the methods described above. Then, rRNA was depleted  
399 following DNase I treatment. RNase R treatment (5 units/mg) was performed in  
400 duplicate with 5 mg of rRNA-depleted RNA input. Fragmented RNA was incubated  
401 with anti-m<sup>6</sup>A polyclonal antibody (Synaptic Systems, 202003) in IPP buffer for 2  
402 hours at 4°C. The mixture was then incubated with protein A/G magnetic beads (88802,  
403 Thermo Fisher) at 4°C for an additional 2 hours. Then, bound RNA was eluted from  
404 the beads with N<sup>6</sup>-methyladenosine (PR3732, BERRY & ASSOCIATES) in IPP buffer  
405 and extracted with Trizol reagent (15596026, Thermo Fisher). NEBNext® Ultra™  
406 RNA Library Prep Kit (E7530L, NEB) was used to construct RNA-seq library from  
407 immunoprecipitated RNA and input RNA. The m<sup>6</sup>A-IP and input samples were  
408 subjected to 150 bp paired-end sequencing on Illumina HiSeq sequencer. Methylated  
409 sites on circRNAs were identified by MetPeak software.

410

### 411 **Construction of circRNA–miRNA–mRNA co-expression network**

412 The circRNA–miRNA–mRNA co-expression network was based on the ceRNA theory  
413 that circRNA and mRNA shared the same MREs. Cytoscape was used to visualize the  
414 circRNA–miRNA–mRNA interactions based on the RNA-seq data. The circRNA-  
415 miRNA interaction and miRNA–mRNA interaction of interest were predicted by  
416 TargetScan and miRanda.

417

### 418 **Measurement of Total m<sup>6</sup>A, MeRIP-RT-PCR and MeRIP-qRT-PCR**

419 Total m<sup>6</sup>A content was measured in 200 ng aliquots of total RNA extracted from  
420 PSMCs and PAECs exposed to 21% O<sub>2</sub> and 1% O<sub>2</sub> for 48 h using an m<sup>6</sup>A RNA

421 methylation quantification kit (P-9005, Epigentek) according to the manufacturer's  
422 instructions. MeRIP (17-701, Millipore) was performed according to the  
423 manufacturer's instruction. A 1.5 g aliquot of anti-m<sup>6</sup>A antibody (ABE572, Millipore)  
424 or anti-IgG (PP64B, Millipore) was conjugated to protein A/G magnetic beads  
425 overnight at 4°C. A 100 ng aliquot of total RNA was then incubated with the antibody  
426 in IP buffer supplemented with RNase inhibitor and protease inhibitor. The RNA  
427 complexes were isolated through phenol-chloroform extraction (P1025, Solarbio) and  
428 analyzed via RT-PCR or qRT-PCR assays. Primers sequences were listed as follows:  
429 circXpo6, 5' TCTGGGAGACAAGGAAGCAG3' (forward) and 5'  
430 CAGGATGGGGATGGGCTG3' (reverse); circTmtc3, 5'  
431 TACCCATGTTTCAGCCAGGTT3' (forward) and 5'  
432 GAAGCCAAGCATTACAGGA3' (reverse); linear Xpo6, 5'  
433 CTGTGTTTTGGGTCAGGAGC 3' (forward) and 5'  
434 ATCGAGTTCCTCTAGCCTGC3' (reverse); linear Tmtc3, 5'  
435 ACTCTGCTGTGATTGGACCA3' (forward) and 5'  
436 AGAAGAGGTTTGATGCGGGA3' (reverse).

437

### 438 **Data analysis**

439 3' adaptor-trimming and low quality reads were removed by cutadapt software (v1.9.3).  
440 Differentially methylated sites were identified by the R MeTDiff package. The read  
441 alignments on genome could be visualized using the tool IGV. DE circRNAs were  
442 identified by Student's *t*-test. GO and KEGG pathway enrichment analysis were  
443 performed for the corresponding parental mRNAs of the DE circRNAs. GO enrichment  
444 analysis was performed using the R topGO package. KEGG pathway enrichment  
445 analysis was performed according to a previous report (52). GO analysis included BP  
446 analysis, CC analysis, and MF analysis. MicroRNAs sponged by the target genes were  
447 predicted by TargetScan and microRNA. P values are calculated by DAVID tool for  
448 GO and KEGG pathway analysis. The rest statistical analyses were performed with  
449 SPSS 19.0 (Chicago, IL, USA) and GraphPad Prism 5 software (La Jolla, CA). N refers  
450 to number of samples in figure legends. The statistical significance was determined by

451 Student's *t*-test (two-tailed) or two-sided Wilcoxon-Mann-Whitney test.  $P < 0.05$  was  
452 considered statistically significant. All experiments were independently repeated at  
453 least three times.

454

#### 455 **Acknowledgements**

456 We thanked all subjects who participated in this study.

457

#### 458 **References**

- 459 1. Steven C. Pugliese JMP, Mehdi A. Fini, Andrea Olschewski, Karim C. El Kasmi, and  
460 Kurt R. Stenmark. The role of inflammation in hypoxic pulmonary hypertension: from  
461 cellular mechanisms to clinical phenotypes. *Am J Physiol Lung Cell Mol Physiol*.  
462 2015;308:L229–L52.
- 463 2. Nazzareno Galiè MH, Jean-Luc Vachiery, Simon Gibbs, Irene Lang, Adam Torbicki,  
464 Gérald Simonneau, et al. 2015 ESC/ERS Guidelines for the diagnosis and treatment of  
465 pulmonary hypertension. *The European respiratory journal*. 2015;46:879–82.
- 466 3. Ruifeng Zhang, Lihong Shi, Lin Zhou, Gensheng Zhang, Xiaohong Wu, Fangchun  
467 Shao, et al. Transgelin as a therapeutic target to prevent hypoxic pulmonary  
468 hypertension. *Am J Physiol Lung Cell Mol Physiol*. 2014;306:L574–L83.
- 469 4. Ball MK, Waypa GB, Mungai PT, Nielsen JM, Czech L, Dudley VJ, et al. Regulation  
470 of hypoxia-induced pulmonary hypertension by vascular smooth muscle hypoxia-  
471 inducible factor-1alpha. *American journal of respiratory and critical care medicine*.  
472 2014;189(3):314-24.
- 473 5. Meng X, Li X, Zhang P, Wang J, Zhou Y, Chen M. Circular RNA: an emerging key  
474 player in RNA world. *Briefings in bioinformatics*. 2017;18(4):547-57.
- 475 6. Salzman J. Circular RNA Expression: Its Potential Regulation and Function. *Trends*  
476 *in genetics* : TIG. 2016;32(5):309-16.
- 477 7. Chen LL, Yang L. Regulation of circRNA biogenesis. *RNA biology*. 2015;12(4):381-  
478 8.
- 479 8. Pamudurti NR, Bartok O, Jens M, Ashwal-Fluss R, Stottmeister C, Ruhe L, et al.  
480 Translation of CircRNAs. *Molecular cell*. 2017;66(1):1-13.
- 481 9. Yang Y, Fan X, Mao M, Song X, Wu P, Zhang Y, et al. Extensive translation of circular  
482 RNAs driven by N(6)-methyladenosine. *Cell research*. 2017;27(5):626-41.
- 483 10. Boeckel JN, Jae N, Heumuller AW, Chen W, Boon RA, Stellos K, et al. Identification  
484 and Characterization of Hypoxia-Regulated Endothelial Circular RNA. *Circulation*  
485 *research*. 2015;117(10):884-90.
- 486 11. Dang RY, Liu FL, Li Y. Circular RNA hsa\_circ\_0010729 regulates vascular  
487 endothelial cell proliferation and apoptosis by targeting the miR-186/HIF-1alpha axis.  
488 *Biochemical and biophysical research communications*. 2017;490(2):104-10.
- 489 12. Wang J, Zhu MC, Kalionis B, Wu JZ, Wang LL, Ge HY, et al. Characteristics of circular  
490 RNA expression in lung tissues from mice with hypoxia-induced pulmonary



- 491 hypertension. *International journal of molecular medicine*. 2018;42(3):1353-66.
- 492 13. Chen K, Lu Z, Wang X, Fu Y, Luo GZ, Liu N, et al. High-resolution N(6) -  
493 methyladenosine (m(6) A) map using photo-crosslinking-assisted m(6) A sequencing.  
494 *Angewandte Chemie*. 2015;54(5):1587-90.
- 495 14. Zhou C, Molinie B, Daneshvar K, Pondick JV, Wang J, Van Wittenberghe N, et al.  
496 Genome-Wide Maps of m6A circRNAs Identify Widespread and Cell-Type-Specific  
497 Methylation Patterns that Are Distinct from mRNAs. *Cell reports*. 2017;20(9):2262-76.
- 498 15. Zheng Y, Nie P, Peng D, He Z, Liu M, Xie Y, et al. m6AVar: a database of functional  
499 variants involved in m6A modification. *Nucleic acids research*. 2018;46(D1):D139-D45.
- 500 16. Xuan JJ, Sun WJ, Lin PH, Zhou KR, Liu S, Zheng LL, et al. RMBase v2.0: deciphering  
501 the map of RNA modifications from epitranscriptome sequencing data. *Nucleic acids*  
502 *research*. 2018;46(D1):D327-D34.
- 503 17. Wang S, Chai P, Jia R, Jia R. Novel insights on m(6)A RNA methylation in  
504 tumorigenesis: a double-edged sword. *Molecular cancer*. 2018;17(1):101.
- 505 18. Dai D, Wang H, Zhu L, Jin H, Wang X. N6-methyladenosine links RNA metabolism  
506 to cancer progression. *Cell Death Dis*. 2018;9(2):124.
- 507 19. Meyer KD, Saletore Y, Zumbo P, Elemento O, Mason CE, Jaffrey SR.  
508 Comprehensive analysis of mRNA methylation reveals enrichment in 3' UTRs and near  
509 stop codons. *Cell*. 2012;149(7):1635-46.
- 510 20. Wang X, Huang J, Zou T, Yin P. Human m(6)A writers: Two subunits, 2 roles. *RNA*  
511 *biology*. 2017;14(3):300-4.
- 512 21. Deng X, Su R, Weng H, Huang H, Li Z, Chen J. RNA N(6)-methyladenosine  
513 modification in cancers: current status and perspectives. *Cell research*.  
514 2018;28(5):507-17.
- 515 22. Wu B, Li L, Huang Y, Ma J, Min J. Readers, writers and erasers of N(6)-methylated  
516 adenosine modification. *Current opinion in structural biology*. 2017;47:67-76.
- 517 23. Liao S, Sun H, Xu C. YTH Domain: A Family of N(6)-methyladenosine (m(6)A)  
518 Readers. *Genomics, proteomics & bioinformatics*. 2018;16(2):99-107.
- 519 24. Patil DP, Pickering BF, Jaffrey SR. Reading m(6)A in the Transcriptome: m(6)A-  
520 Binding Proteins. *Trends in cell biology*. 2018;28(2):113-27.
- 521 25. Subbarayalu Panneerdoss VKE, Pooja Yadav, Santosh Timilsina, Subapriya  
522 Rajamanickam, Suryavathi Viswanadhapalli, Nourhan Abdelfattah, et al. Cross-talk  
523 among writers, readers, and erasers of m6A regulates cancer growth and progression.  
524 *SCIENCE ADVANCES*. 2018;4:eaar8263.
- 525 26. Zhang C, Samanta D, Lu H, Bullen JW, Zhang H, Chen I, et al. Hypoxia induces the  
526 breast cancer stem cell phenotype by HIF-dependent and ALKBH5-mediated m(6)A-  
527 demethylation of NANOG mRNA. *Proc Natl Acad Sci* 2016;113(14):E2047-56.
- 528 27. Rowan SC, Keane MP, Gaine S, McLoughlin P. Hypoxic pulmonary hypertension in  
529 chronic lung diseases: novel vasoconstrictor pathways. *The Lancet Respiratory*  
530 *Medicine*. 2016;4(3):225-36.
- 531 28. Chan JJ, Tay Y. Noncoding RNA:RNA Regulatory Networks in Cancer. *International*  
532 *journal of molecular sciences*. 2018;19(5):1310.
- 533 29. Baarsma HA, Konigshoff M. 'WNT-er is coming': WNT signalling in chronic lung  
534 diseases. *Thorax*. 2017;72(8):746-59.

- 535 30. de Jesus Perez V, Yuan K, Alastalo TP, Spiekerkoetter E, Rabinovitch M. Targeting  
536 the Wnt signaling pathways in pulmonary arterial hypertension. *Drug discovery today*.  
537 2014;19(8):1270-6.
- 538 31. Savai R, Al-Tamari HM, Sedding D, Kojonazarov B, Muecke C, Teske R, et al. Pro-  
539 proliferative and inflammatory signaling converge on FoxO1 transcription factor in  
540 pulmonary hypertension. *Nature medicine*. 2014;20(11):1289-300.
- 541 32. Su H, Xu X, Yan C, Shi Y, Hu Y, Dong L, et al. LncRNA H19 promotes the proliferation  
542 of pulmonary artery smooth muscle cells through AT1R via sponging let-7b in  
543 monocrotaline-induced pulmonary arterial hypertension. *Respir Res*. 2018;19(1):254.
- 544 33. Caruso P, MacLean MR, Khanin R, McClure J, Soon E, Southgate M, et al. Dynamic  
545 changes in lung microRNA profiles during the development of pulmonary  
546 hypertension due to chronic hypoxia and monocrotaline. *Arteriosclerosis, thrombosis,  
547 and vascular biology*. 2010;30(4):716-23.
- 548 34. Zhong X, Yu J, Frazier K, Weng X, Li Y, Cham CM, et al. Circadian Clock Regulation  
549 of Hepatic Lipid Metabolism by Modulation of m(6)A mRNA Methylation. *Cell reports*.  
550 2018;25(7):1816–28.
- 551 35. Dorn LE, Lasman L, Chen J, Xu X, Hund TJ, Medvedovic M, et al. The N(6)-  
552 Methyladenosine mRNA Methylase METTL3 Controls Cardiac Homeostasis and  
553 Hypertrophy. *Circulation*. 2019;139(4):533-45.
- 554 36. Dandan Yang, Jing Qiao, Guiying Wang, Yuanyuan Lan, Guoping Li, Xudong Guo, et  
555 al. N<sup>6</sup>-Methyladenosine modification of lincRNA 1281 is critically required for mESC  
556 *Nucleic Acids Res*. 2018; 46(8): 3906-3920.
- 557 37. Nate J. Fry BAL, Olga R. Ilkayeva, Christopher L. Holley, and Kyle D. Mansfield. N6-  
558 methyladenosine is required for the hypoxic stabilization of specific mRNAs. *Rna*.  
559 2017;23(9):1444-55.
- 560 38. Song H, Feng X, Zhang H, Luo Y, Huang J, Lin M, et al. METTL3 and ALKBH5  
561 oppositely regulate m(6)A modification of TFEB mRNA, which dictates the fate of  
562 hypoxia/reoxygenation-treated cardiomyocytes. *Autophagy*. 2019:1-19.
- 563 39. Luo GZ, MacQueen A, Zheng G, Duan H, Dore LC, Lu Z, et al. Unique features of  
564 the m6A methylome in *Arabidopsis thaliana*. *Nature communications*. 2014;5:5630.
- 565 40. Chen L, Zhang S, Wu J, Cui J, Zhong L, Zeng L, et al. circRNA\_100290 plays a role in  
566 oral cancer by functioning as a sponge of the miR-29 family. *Oncogene*.  
567 2017;36(32):4551-61.
- 568 41. Salmena L, Poliseno L, Tay Y, Kats L, Pandolfi PP. A ceRNA hypothesis: the Rosetta  
569 Stone of a hidden RNA language? *Cell*. 2011;146(3):353-8.
- 570 42. James D. West EDA, Christa Gaskill, Shennea Marriott, Rubin Baskir, Ganna  
571 Bilousova, Jyh-Chang Jean, et al. Identification of a common Wnt-associated genetic  
572 signature across multiple cell types in pulmonary arterial hypertension. *Am J Physiol  
573 Cell Physiol*. 2014;307:C415–C30.
- 574 43. Awad H, Nolette N, Hinton M, Dakshinamurti S. AMPK and FoxO1 regulate  
575 catalase expression in hypoxic pulmonary arterial smooth muscle. *Pediatric  
576 pulmonology*. 2014;49(9):885-97.
- 577 44. Cowburn AS, Crosby A, Macias D, Branco C, Colaco RD, Southwood M, et al.  
578 HIF2alpha-arginase axis is essential for the development of pulmonary hypertension.

- 579 Proceedings of the National Academy of Sciences of the United States of America.  
580 2016;113(31):8801-6.
- 581 45. Xu X, Hu H, Wang X, Ye W, Su H, Hu Y, et al. Involvement of CapG in proliferation  
582 and apoptosis of pulmonary arterial smooth muscle cells and in hypoxia-induced  
583 pulmonary hypertension rat model. *Experimental lung research*. 2016;42(3):142-53.
- 584 46. Yamazato Y, Ferreira AJ, Hong KH, Sriramula S, Francis J, Yamazato M, et al.  
585 Prevention of pulmonary hypertension by Angiotensin-converting enzyme 2 gene  
586 transfer. *Hypertension*. 2009;54(2):365-71.
- 587 47. Xiao R, Su Y, Feng T, Sun M, Liu B, Zhang J, et al. Monocrotaline Induces Endothelial  
588 Injury and Pulmonary Hypertension by Targeting the Extracellular Calcium-Sensing  
589 Receptor. *Journal of the American Heart Association*. 2017;6(4):e004865.
- 590 48. Xin Yun, Haiyang Jiang, Ning Lai, Jian Wang, and Larissa A. Aquaporin 1-mediated  
591 changes in pulmonary arterial smooth muscle cell migration and proliferation involve  
592  $\beta$ -catenin. *Am J Physiol Lung Cell Mol Physiol*. 2017;313:L889–L98.
- 593 49. Zhang HY, Liu Y, Yan LX, Du W, Zhang XD, Zhang M, et al. Bone morphogenetic  
594 protein-7 inhibits endothelial-mesenchymal transition in pulmonary artery  
595 endothelial cell under hypoxia. *Journal of Cellular Physiology*. 2018;233(5):4077-90.
- 596 50. Omura J, Satoh K, Kikuchi N, Satoh T, Kurosawa R, Nogi M, et al. Protective Roles  
597 of Endothelial AMP-Activated Protein Kinase Against Hypoxia-Induced Pulmonary  
598 Hypertension in Mice. *Circulation research*. 2016;119(2):197-209.
- 599 51. Thomas B. Hansen MTV, Christian K. Damgaard and Jørgen Kjems. Comparison of  
600 circular RNA prediction tools. *Nucleic acids research*. 2015;44(6):e58.
- 601 52. Tian L, Greenberg SA, Kong SW, Altschuler J, Kohane IS, Park PJ. Discovering  
602 statistically significant pathways in expression profiling studies. *Proceedings of the*  
603 *National Academy of Sciences of the United States of America*. 2005;102(38):13544-  
604 9.

605

606

607

608

609

610

611

612

613

614

615

616

617

618

619

620

621

622

623

## 624 **Figure legends**

### 625 **Fig 1. m<sup>6</sup>A level of circRNAs in HPH rats and the number of m<sup>6</sup>A peak in** 626 **circRNAs**

627 Rats were maintained in a normobaric normoxic (FiO<sub>2</sub> 21%) or hypoxic (FiO<sub>2</sub> 10%)  
628 chamber for 3 weeks, then RVSP was detected (A, B). (C) The ratio of RV/ (LV+S).  
629 (D) H&E staining and immunohistochemical staining of  $\alpha$ -SMA were performed in the  
630 lung sections. Representative images of pulmonary small arteries. Scale bar = 50  $\mu$ m.  
631 Quantification of wall thickness (E) and vessel muscularization (F). (G) Heatmap  
632 depicting hierarchical clustering of altered m<sup>6</sup>A circRNAs in lungs of normal (N) and  
633 hypoxic pulmonary hypertension (HPH) rats. Red represents higher expression and  
634 yellow represents lower expression level. (H) Box-plot for m<sup>6</sup>A peaks enrichment in  
635 circRNAs in N and HPH. (I) The distribution of the number of circRNAs (y axis) was  
636 plotted based on the number of m<sup>6</sup>A peaks in circRNAs (x axis) in N and HPH. Values  
637 are presented as means  $\pm$  SD (n = 6 in each group). Only vessels with diameter between  
638 30 and 90  $\mu$ m were analyzed. NM, nonmuscularized vessels; PM, partially  
639 muscularized vessels; FM, fully muscularized vessels. \*\*0.001  $\leq$  p  $\leq$  0.009 (different  
640 from N); \*\*\*p < 0.001 (different from N).

641

### 642 **Fig 2. The genomic origins of m<sup>6</sup>A circRNAs**

643 The distribution of genomic origins of total circRNAs (input, left), m<sup>6</sup>A circRNAs  
644 (eluate, center), and non-m<sup>6</sup>A circRNAs (supernatant, right) in N (A) and HPH (B). The  
645 percentage of circRNAs (y axis) was calculated according to the number of exons (x  
646 axis) spanned by each circRNA for the input circRNAs (left), m<sup>6</sup>A-circRNAs (red, right)

647 and non-m<sup>6</sup>A circRNAs (blue, right) in N (C) and HPH (D). Up to seven exons are  
648 shown.

649

650 **Fig 3. The distribution and functional analysis for host genes of circRNAs with**  
651 **differentially expressed (DE) m<sup>6</sup>A peaks**

652 (A) DE m<sup>6</sup>A circRNAs length. (B) The chromosomes origins for host genes of DE m<sup>6</sup>A  
653 circRNAs. GO enrichment and KEGG signaling pathway analysis for host genes of  
654 upregulated (C) and downregulated (D) m<sup>6</sup>A circRNAs. GO enrichment analysis  
655 include biological process (BP) analysis, cellular component (CC) analysis, and  
656 molecular function (MF) analysis. P values are calculated by DAVID tool.

657

658 **Fig 4. The relationship of m<sup>6</sup>A level of circRNAs and circRNAs abundance in**  
659 **hypoxia**

660 (A) Venn diagram depicting the overlap of m<sup>6</sup>A circRNAs between N and HPH. (B)  
661 Two-dimensional histograms comparing the expression of m<sup>6</sup>A circRNAs in lungs of  
662 N and HPH rats. It showed that m<sup>6</sup>A circRNAs levels for all shared circRNAs in both  
663 groups. CircRNAs counts were indicated on the scale to the right. (C) Cumulative  
664 distribution of circRNAs expression between N and HPH for m<sup>6</sup>A circRNAs (red) and  
665 non-m<sup>6</sup>A circRNAs (blue). P value was calculated using two-sided Wilcoxon-Mann-  
666 Whiteney test.

667

668 **Fig 5. Construction of a circRNA–miRNA–mRNA co-expression network in HPH**

669 (A) Comparison of the relationship between m<sup>6</sup>A level and expression of circRNAs  
670 between N and HPH. The fold-change  $\geq 2.0$  was considered to be significant, which was  
671 the abundance of m<sup>6</sup>A peaks of HPH relative to N. Red dots represents circRNAs with  
672 upregulated m<sup>6</sup>A level and blue dots represents circRNAs with downregulated m<sup>6</sup>A  
673 level. IP/Input referred to the abundance of m<sup>6</sup>A peak in circRNAs detected in MeRIP-  
674 Seq (IP) normalized to that detected in input. (B and C) GO enrichment analysis  
675 includes BP analysis, CC analysis, and MF analysis. P values are calculated by DAVID  
676 tool. (D and E) KEGG signaling pathway analysis for the downstream mRNAs which

677 was predicted to be ceRNA of DE circRNAs. Methy. down & exp. down represents  
678 downregulated circRNAs with decreased m<sup>6</sup>A level. Methy. up & exp. up represents  
679 upregulated circRNAs with increased m<sup>6</sup>A level. (F and G) CeRNA analysis for DE  
680 circRNAs. Network map of circRNA-miRNA-mRNA interactions. Green V type node:  
681 miRNA; yellow circular node: DE circRNAs; blue hexagon node: target genes of  
682 miRNAs; red hexagon node: PH-related genes.

683

684 **Fig 6. The expression profiling of m<sup>6</sup>A circXpo6 and m<sup>6</sup>A circTmtc3 in PSMCs**  
685 **and PAECs in hypoxia**

686 (A) Box-plot for m<sup>6</sup>A peaks enrichment in circRNAs *in vitro*. Pulmonary arterial  
687 smooth muscle cells (PSMCs) and pulmonary artery endothelial cells (PAECs) were  
688 exposed to 21% O<sub>2</sub> and 1% O<sub>2</sub> for 48 h. Total RNA was extracted and treated by RNase  
689 R. m<sup>6</sup>A levels were determined as a percentage of total circRNAs. (B) Schematic  
690 representation of exons of the Xpo6 and Tmtc3 circularization forming circXpo6 and  
691 circTmtc3 (black arrow). (C) RT-PCR validation of circXpo6 and circTmtc3 in  
692 PSMCs and PAECs exposed to 21% O<sub>2</sub>. Divergent primers amplified circRNAs in  
693 cDNA, but not in genomic DNA (gDNA). The size of the DNA marker is indicated on  
694 the left of the gel. (D and E) RT-PCR and qRT-PCR was performed after m<sup>6</sup>A RIP in  
695 PSMCs and PAECs exposed to 21% (N) and 1% O<sub>2</sub> (H) for 48 h. Input was used as a  
696 control (D). IgG was used as a negative control (E). Values are presented as means ±  
697 SD. \*p ≤ 0.05 (different from 21% O<sub>2</sub> or the N-anti-m<sup>6</sup>A); \*\*0.001 ≤ p ≤ 0.009  
698 (different from the N-anti-m<sup>6</sup>A).

699

700 **Supporting information**

701 **S1 Fig. KEGG pathway analysis for Wnt and FoxO signaling pathway in methy.**  
702 **up & exp. up group.**

703

704 **S2 Fig. KEGG pathway analysis for Wnt and FoxO signaling pathway in methy.**  
705 **down & exp. down group.**

706

707 **S1 Table. Differentially expressed m<sup>6</sup>A abundance in circRNAs.**

708

709 **S2 Table. Differentially expressed m<sup>6</sup>A abundance linked with differentially**  
710 **expressed circRNAs abundance.**

711

712

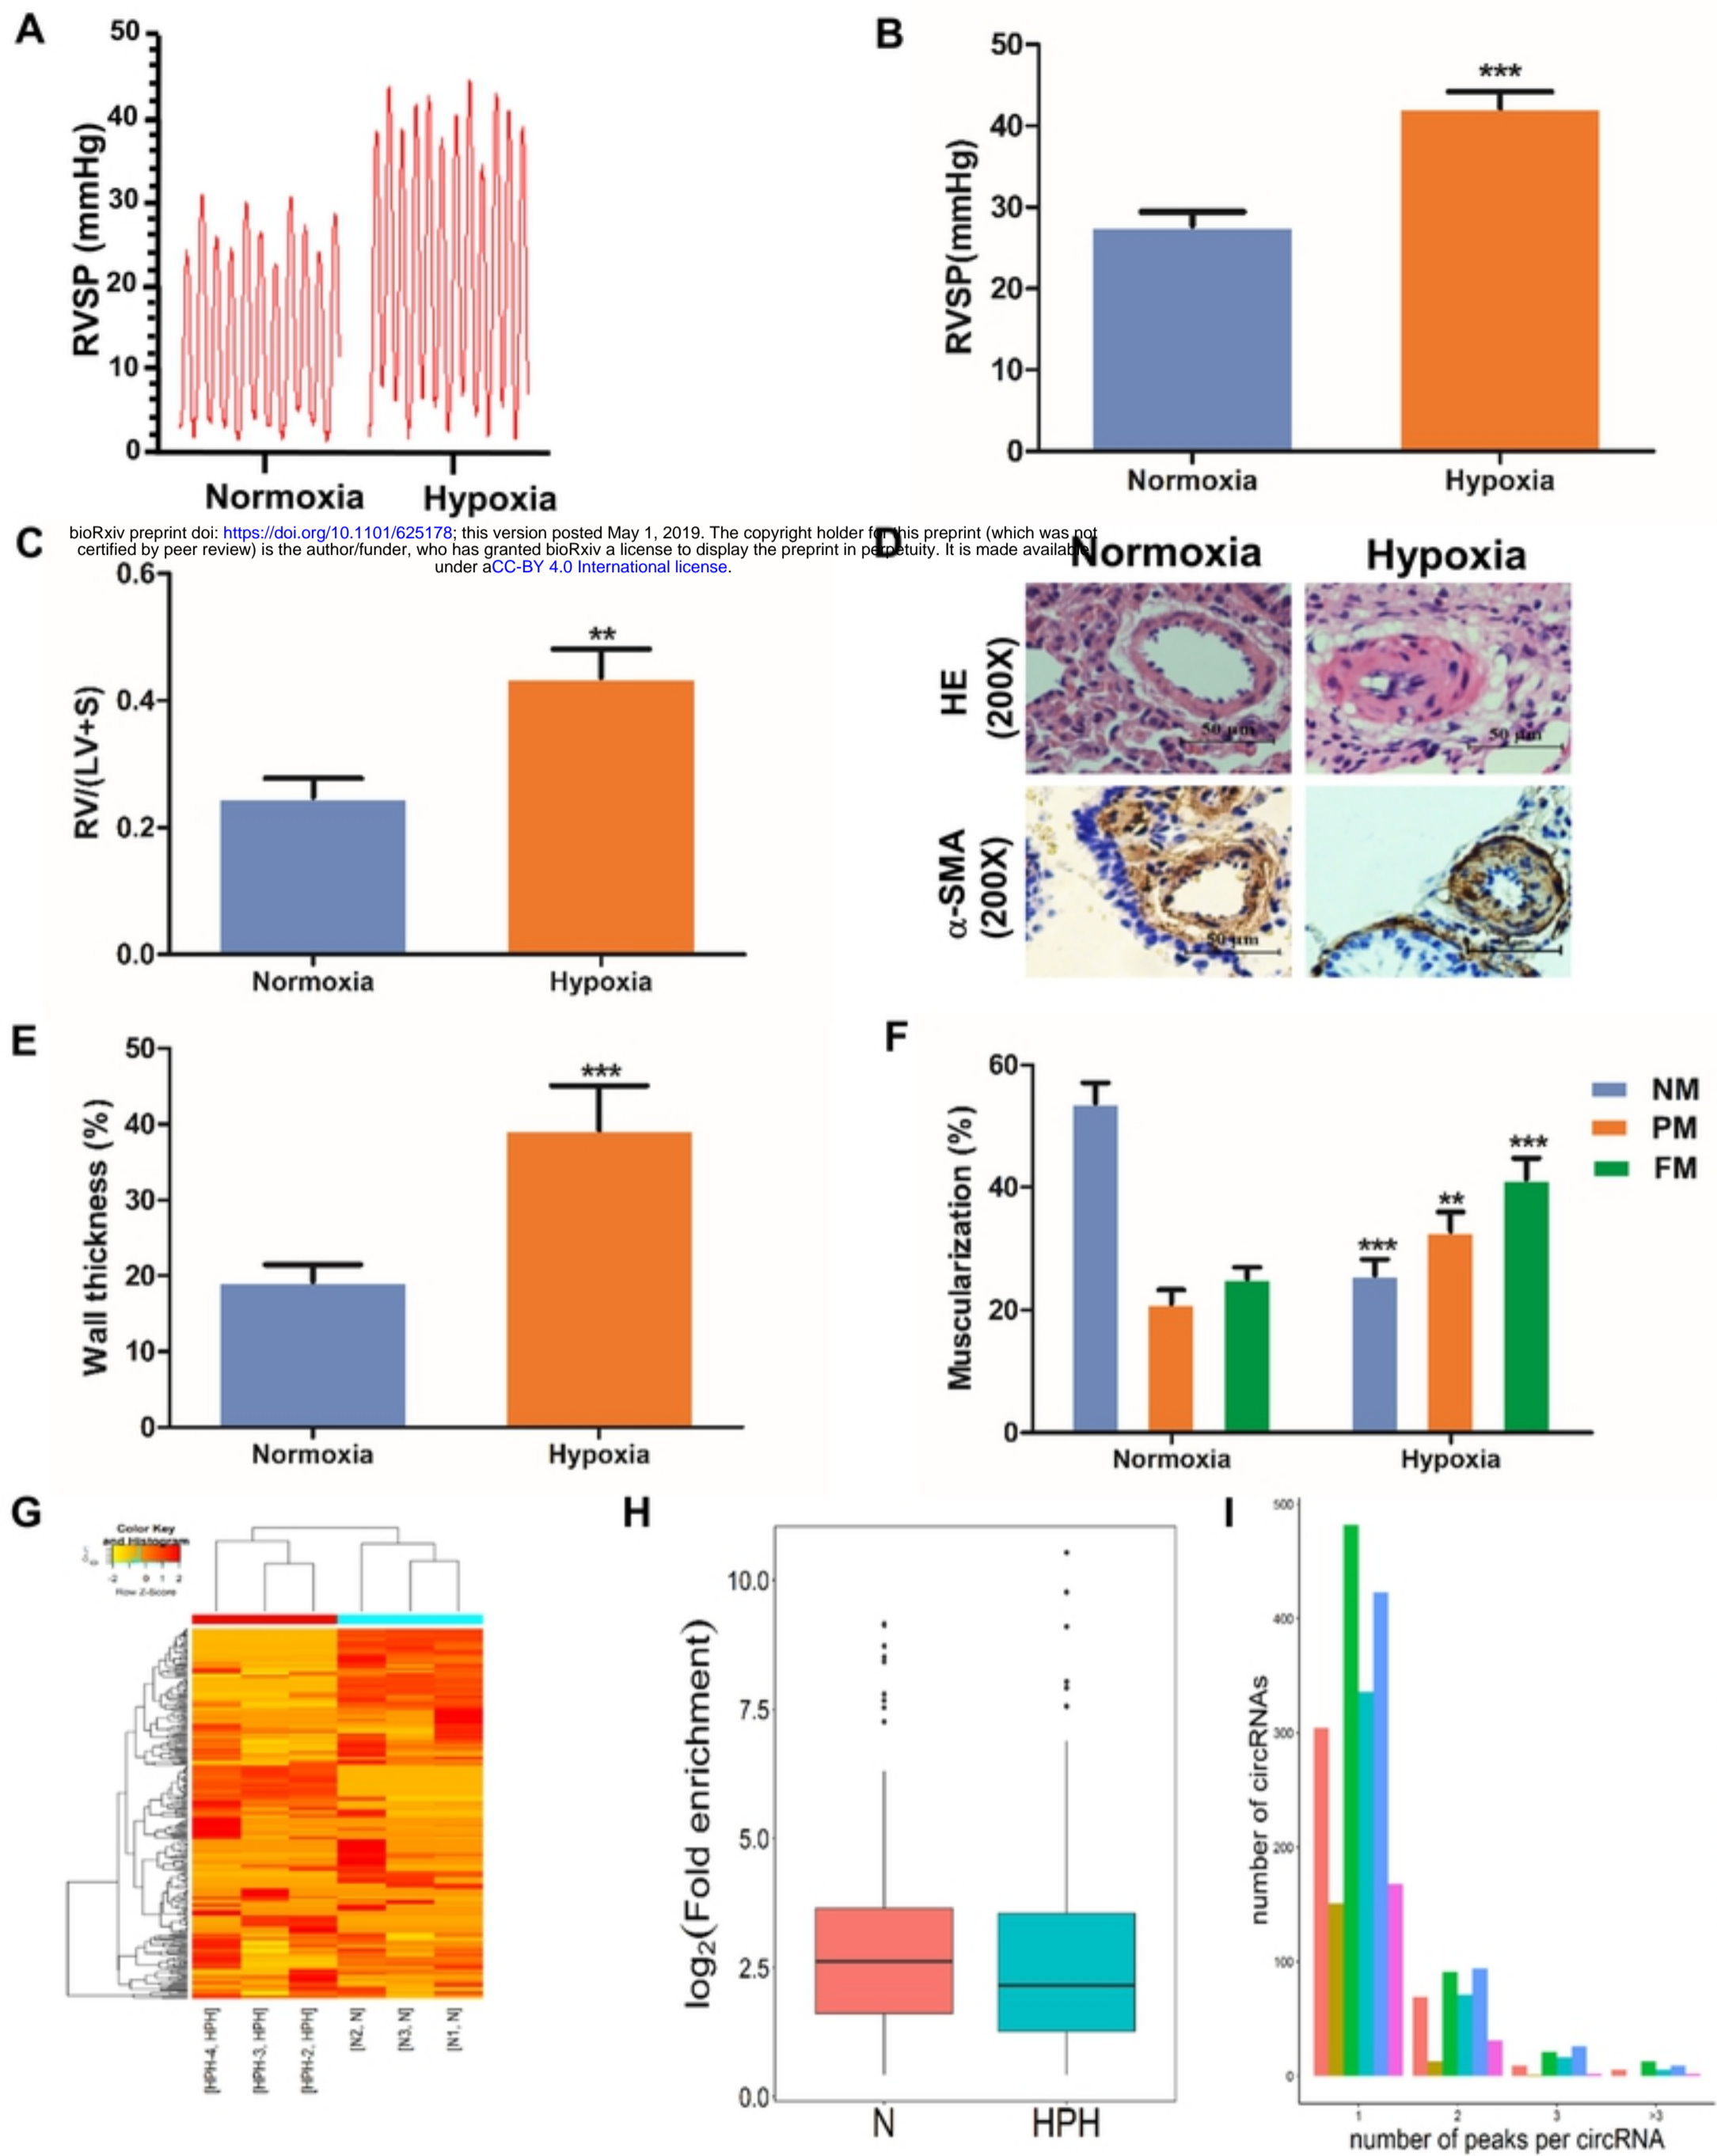

Figure 1



**A N**

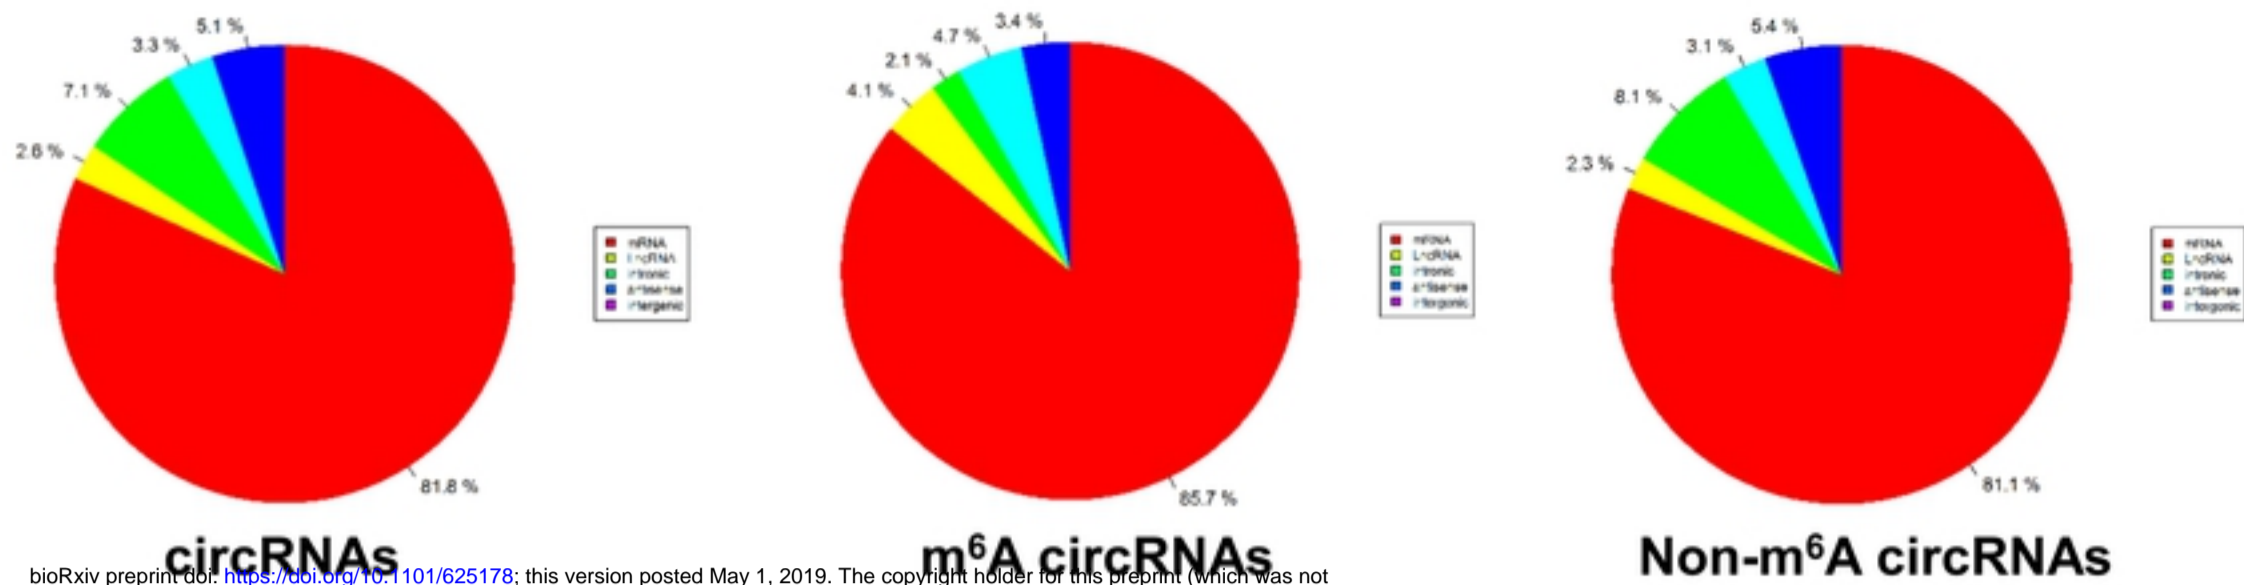

**B HPH**

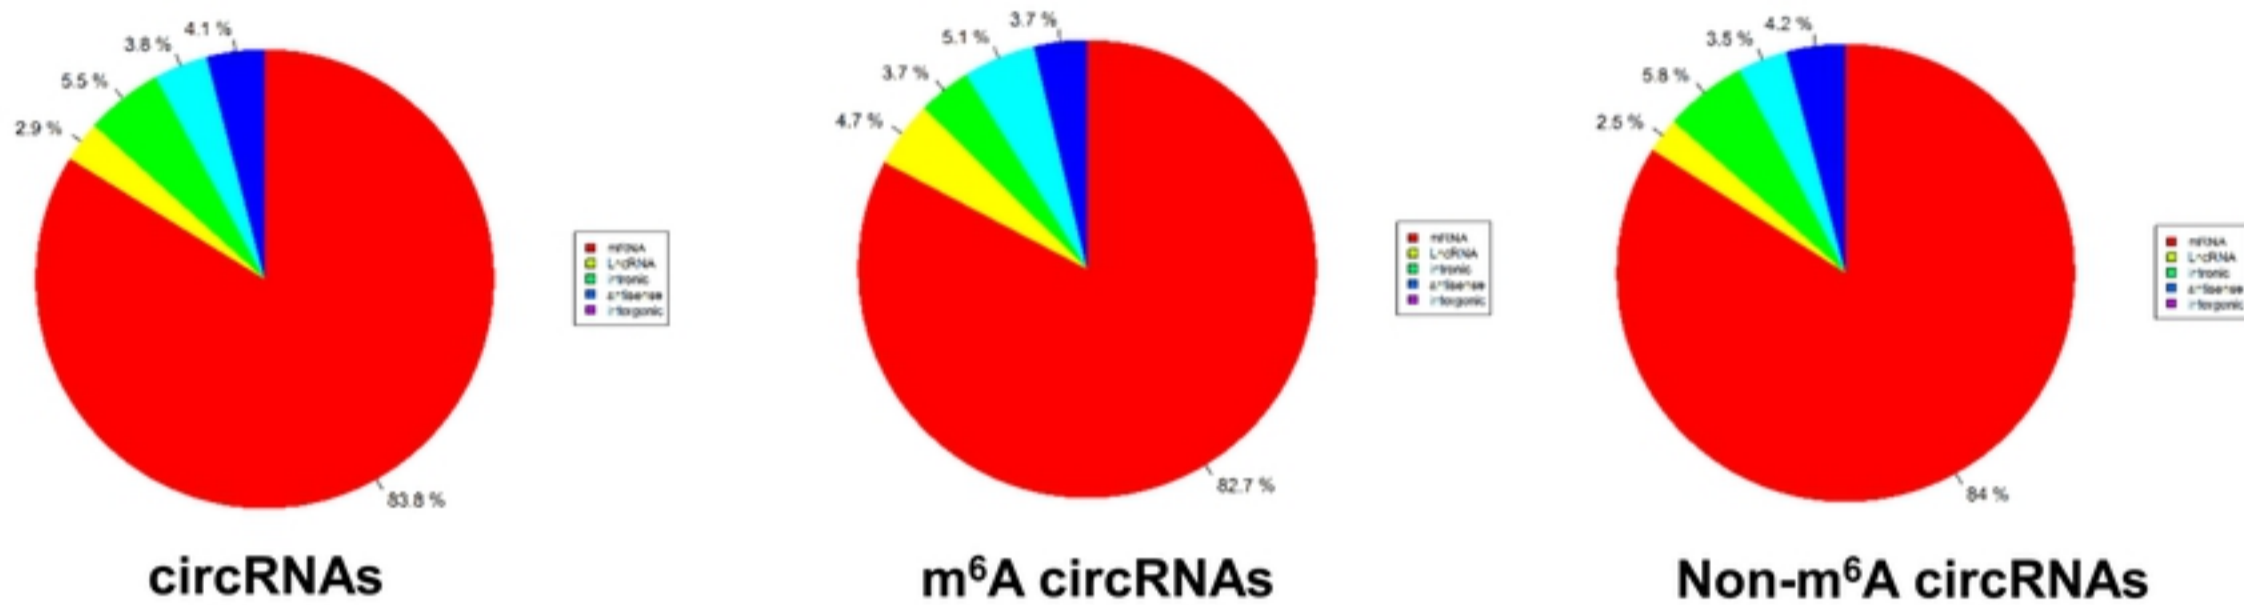

**C N**

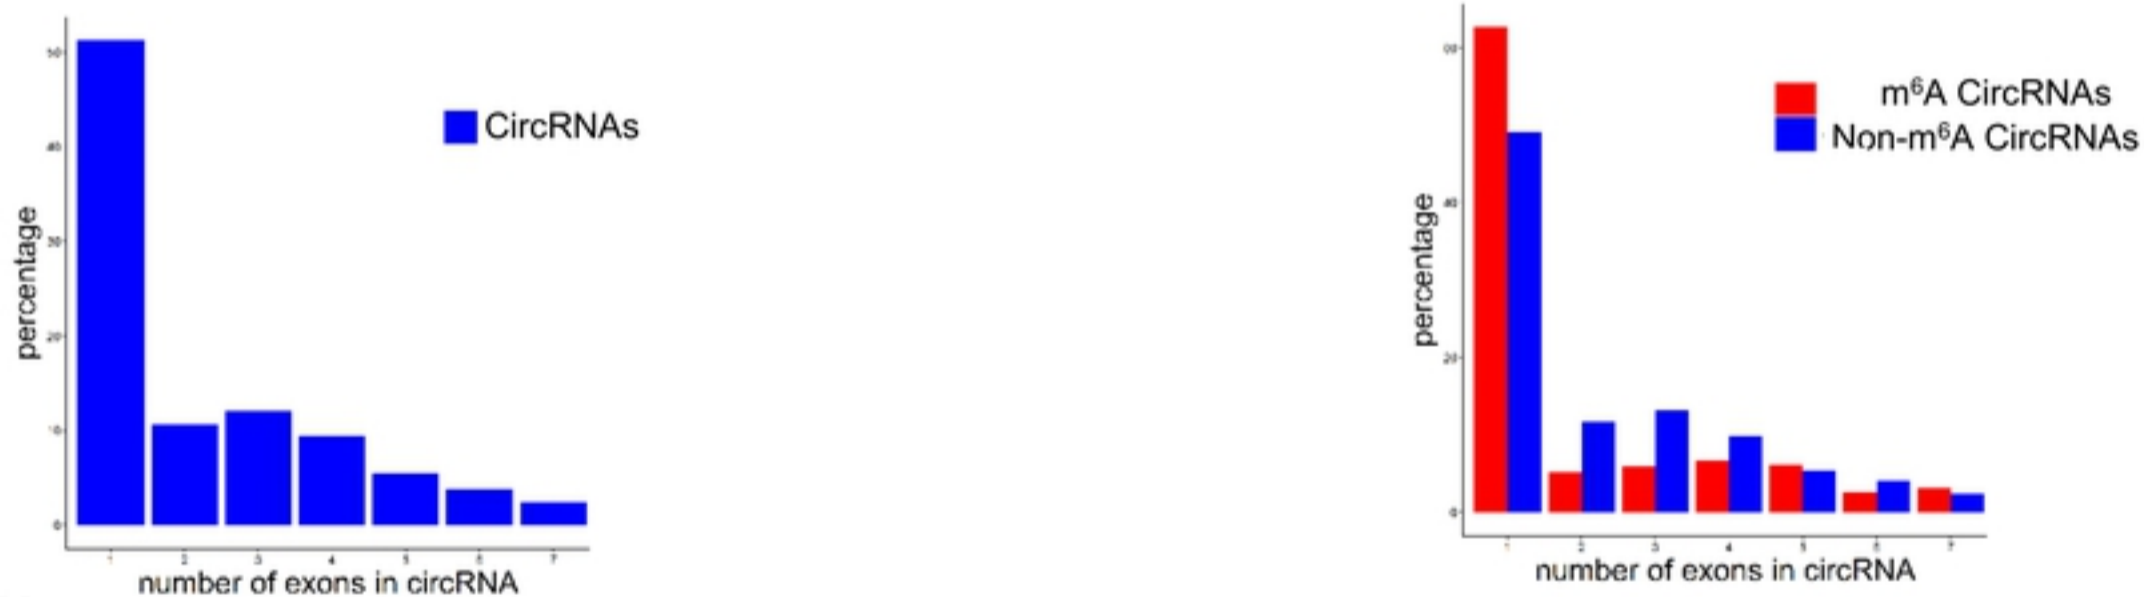

**D HPH**

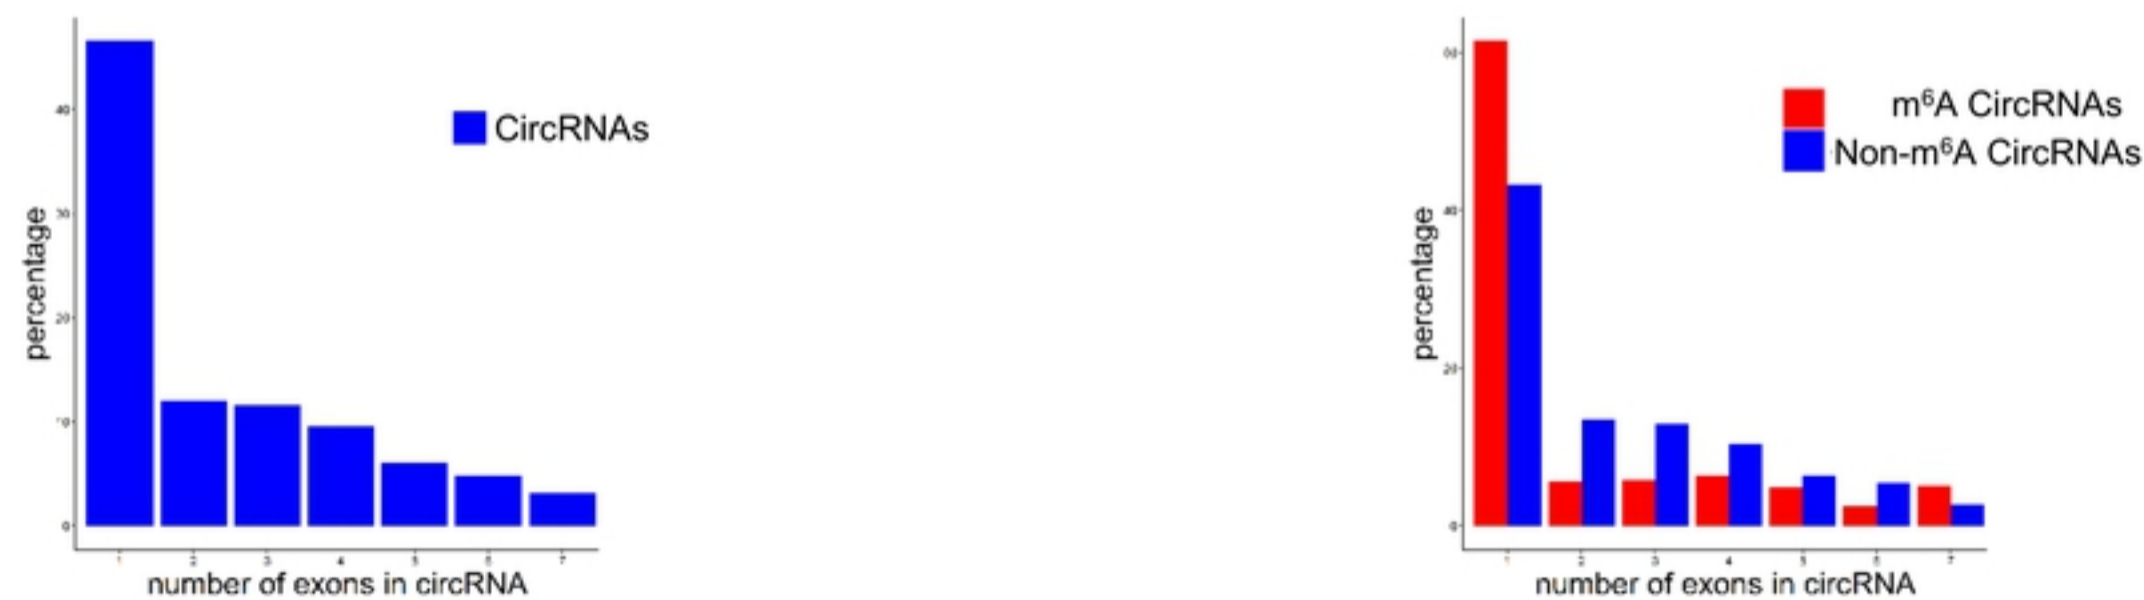

Figure 2

## A Upregulated

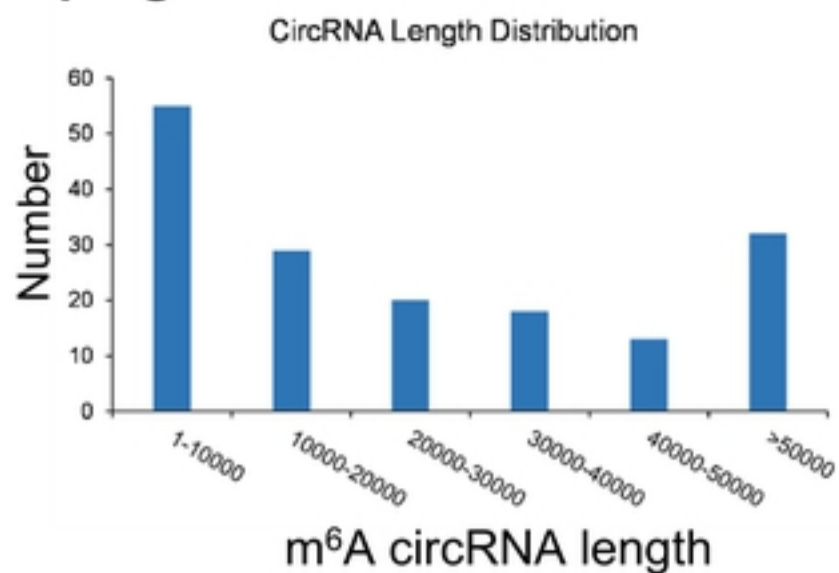

## Downregulated

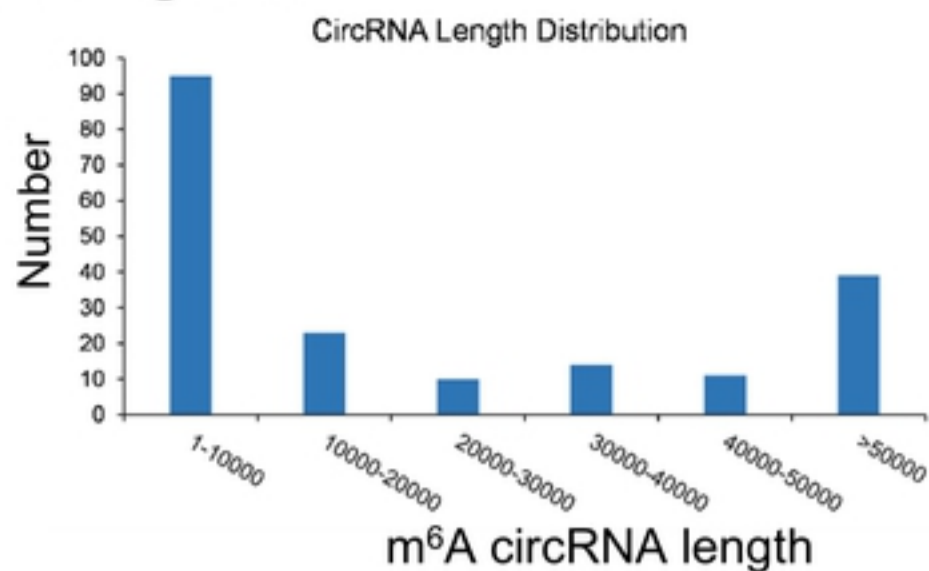

## B Upregulated

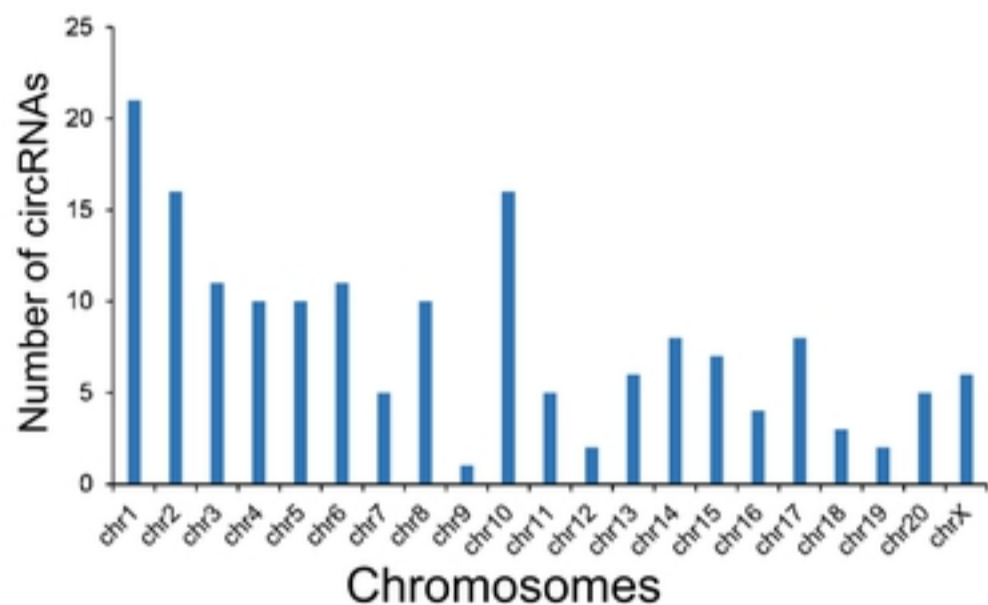

## Downregulated

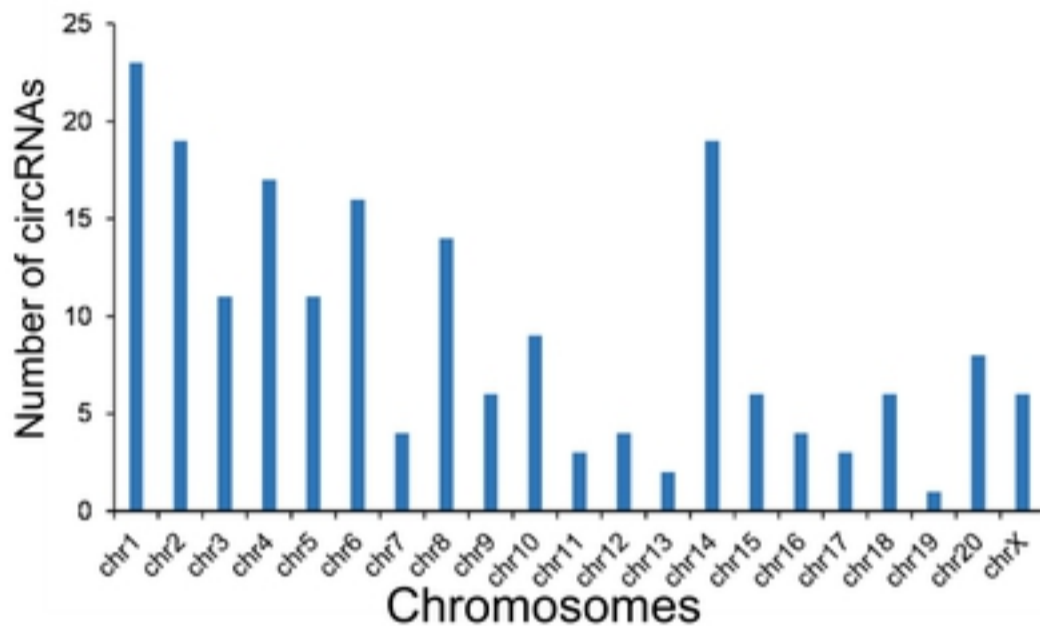

## C Upregulated

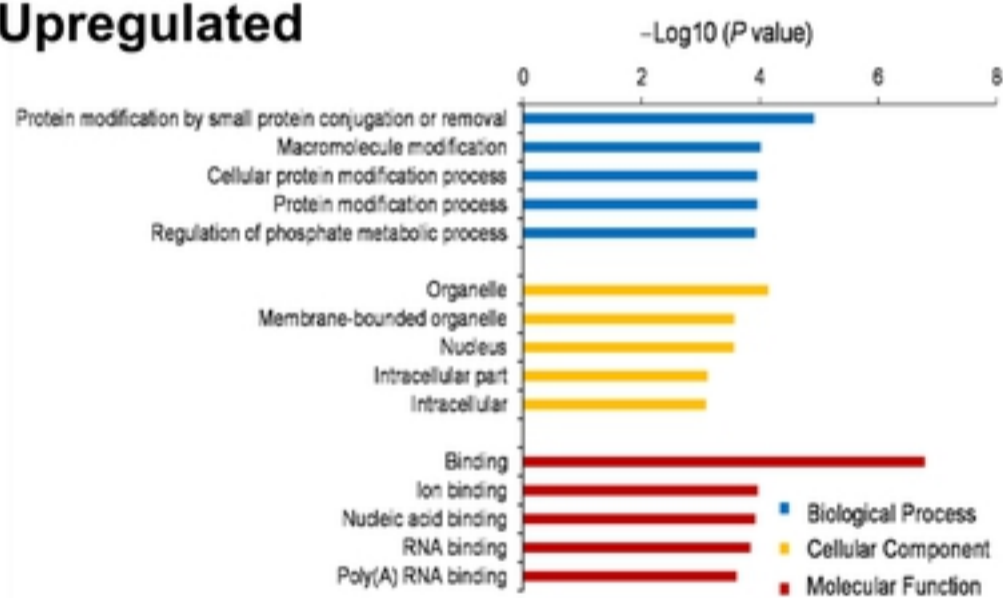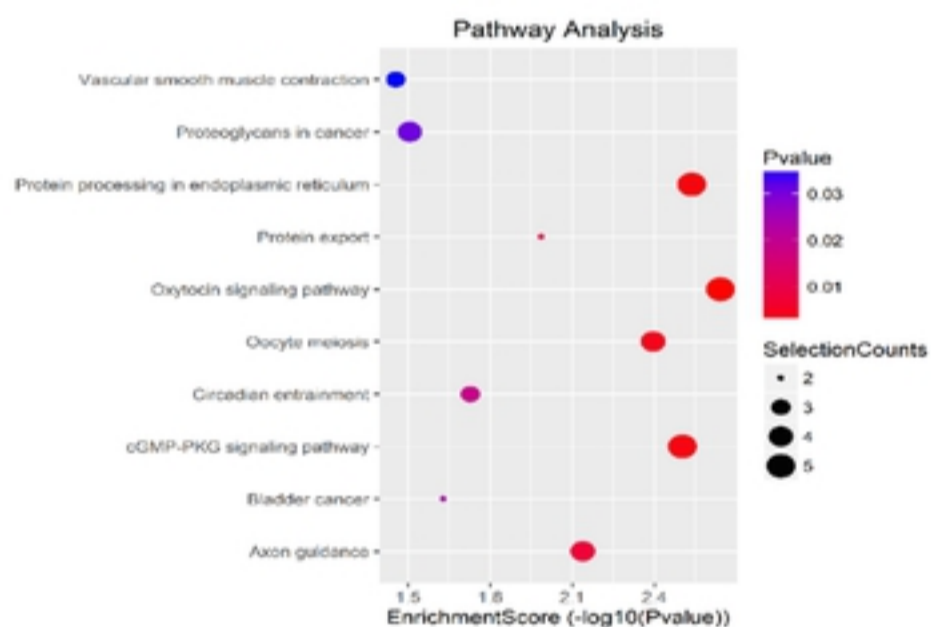

## D Downregulated

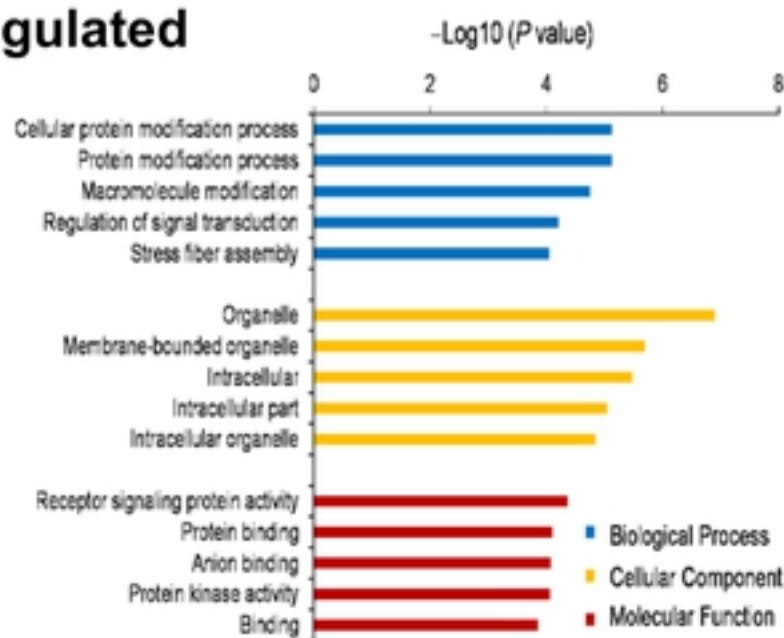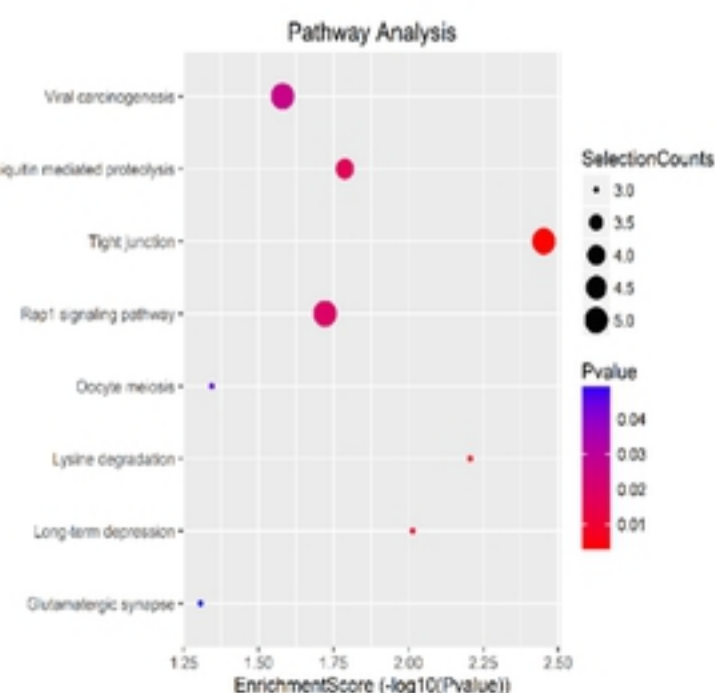

Figure 3

**A**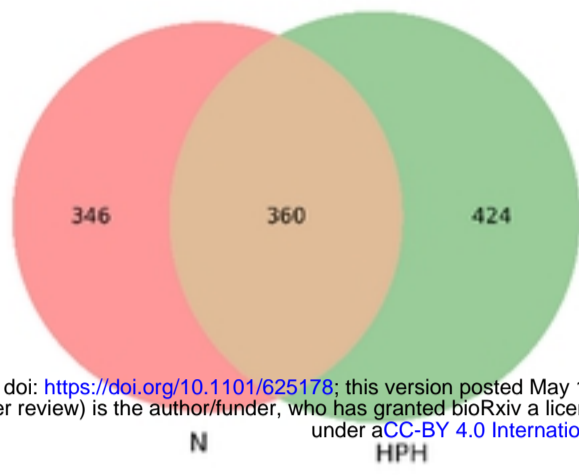

bioRxiv preprint doi: <https://doi.org/10.1101/625178>; this version posted May 1, 2019. The copyright holder for this preprint (which was not certified by peer review) is the author/funder, who has granted bioRxiv a license to display the preprint in perpetuity. It is made available under aCC-BY 4.0 International license.

**Shared circRNAs**

**B**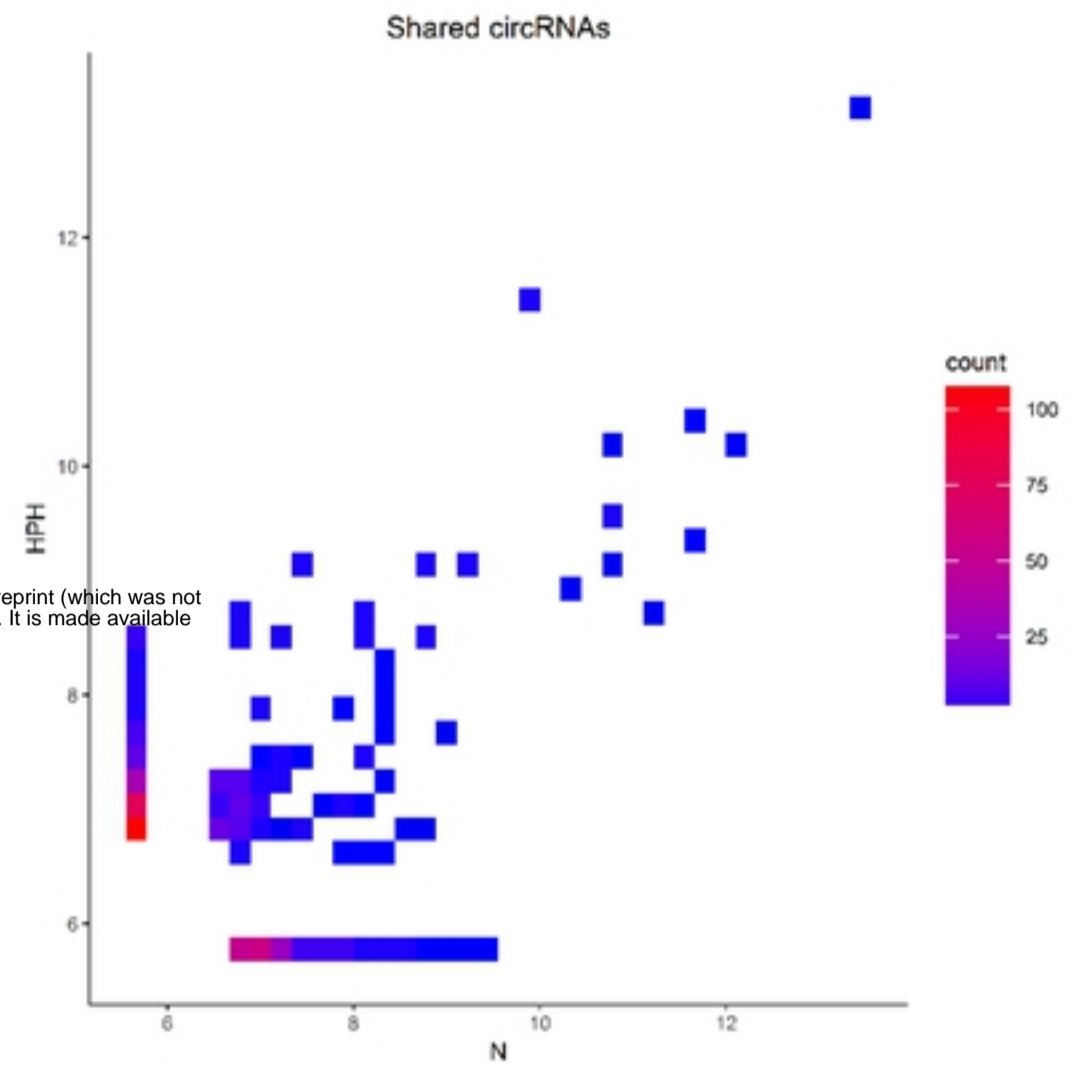**C**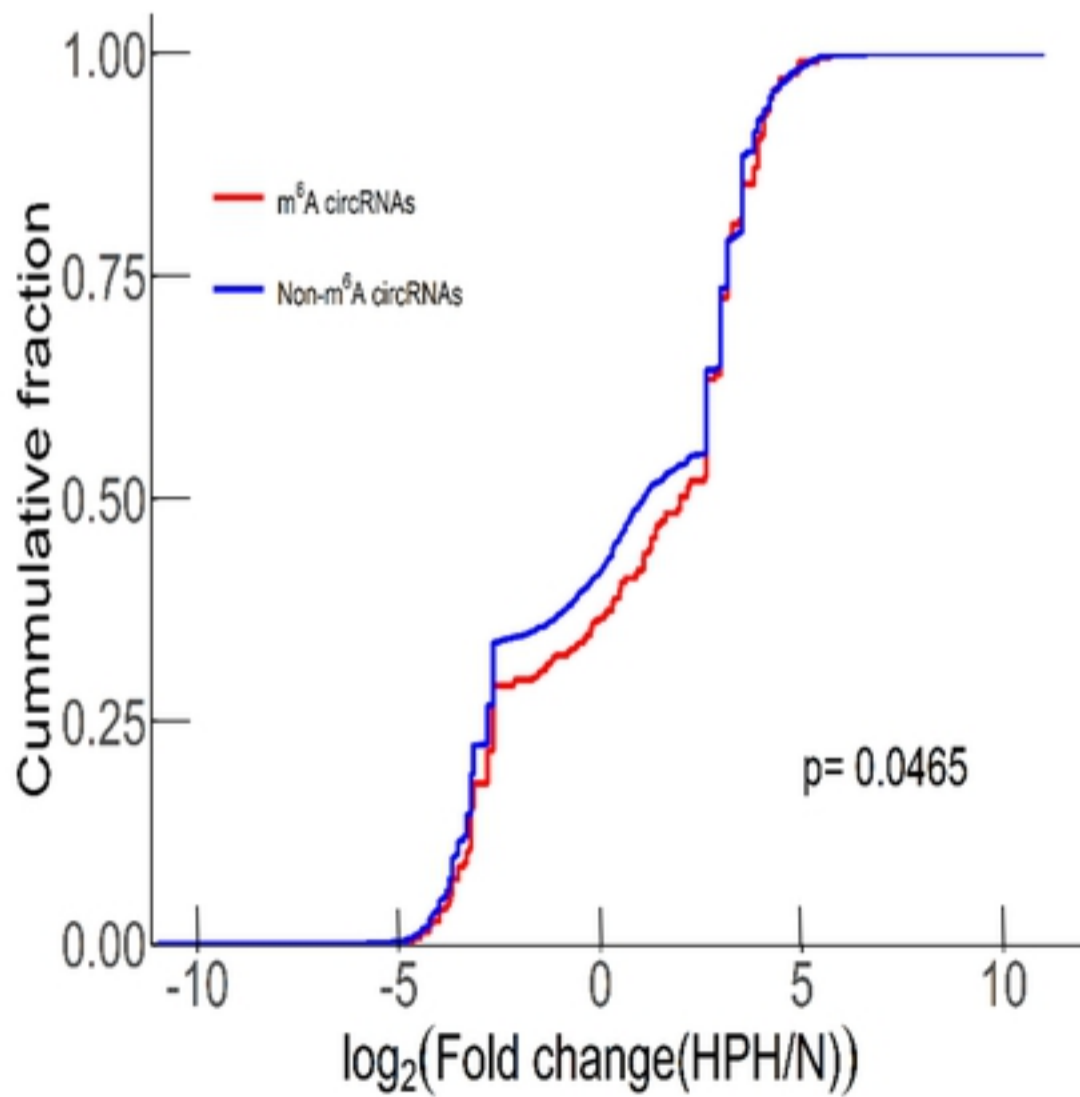

Figure 4

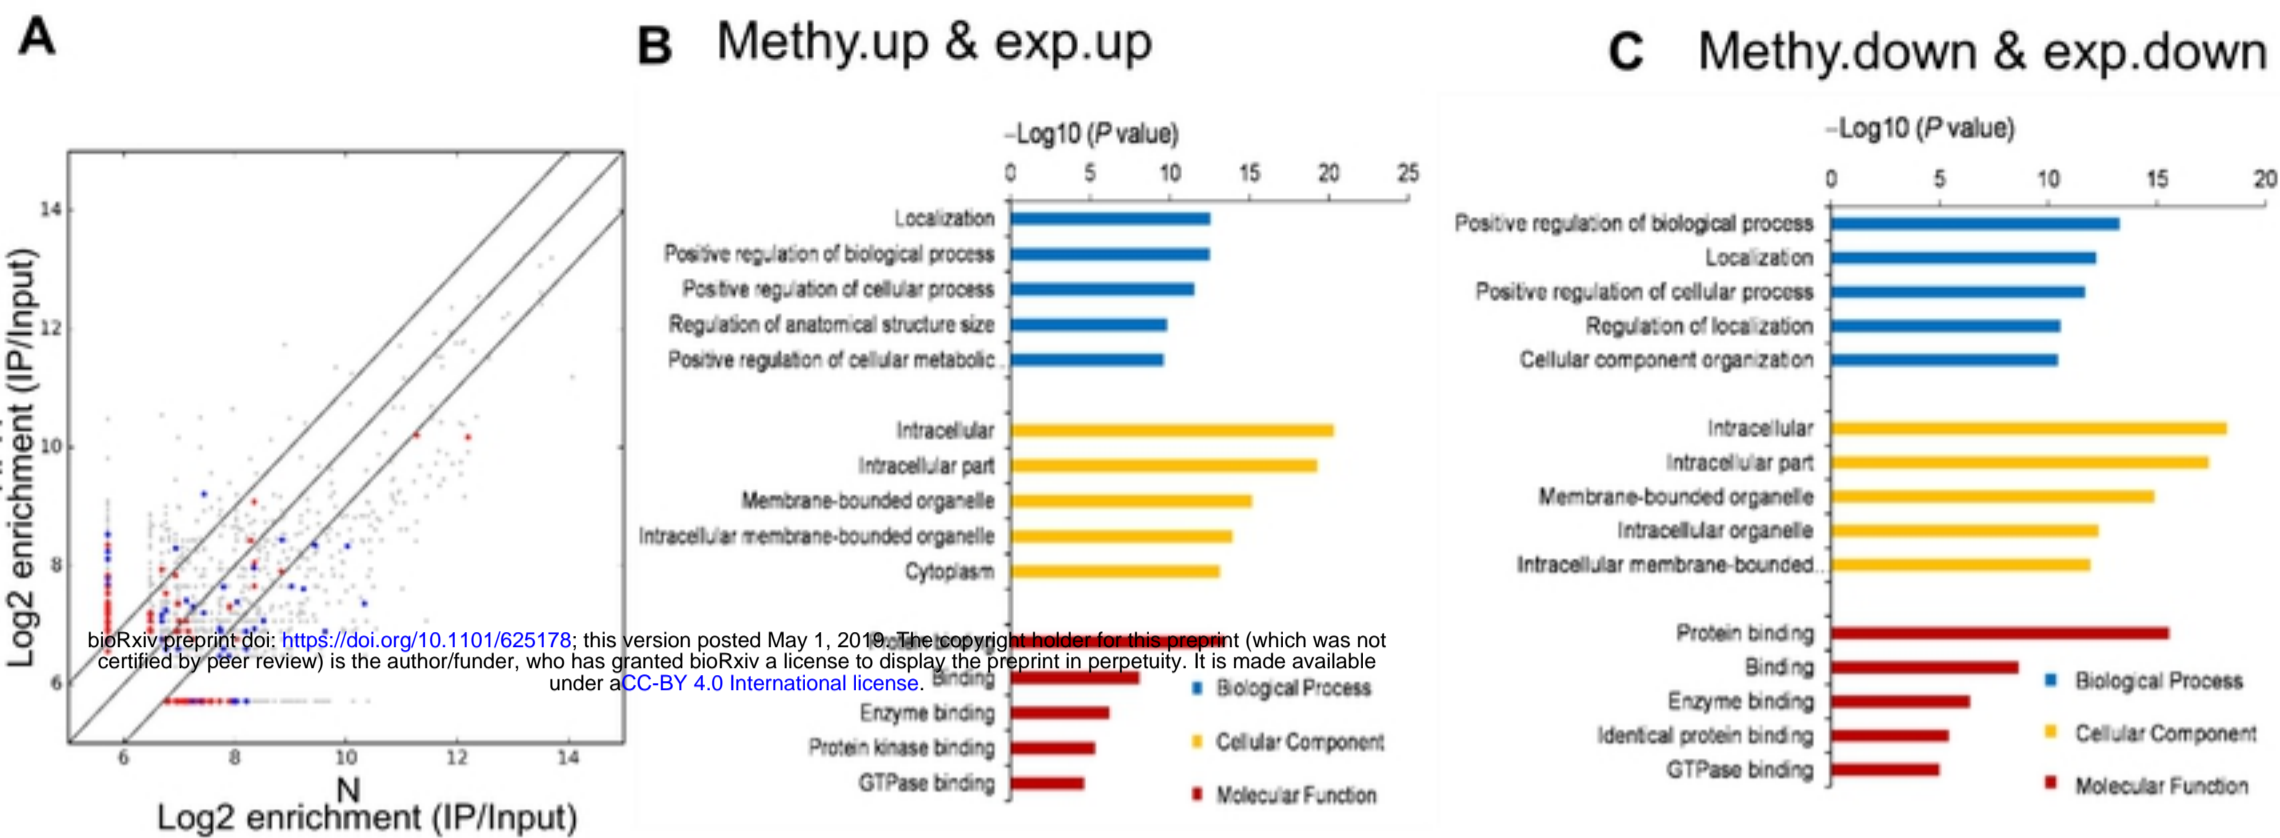

**D Methy.up & exp.up**

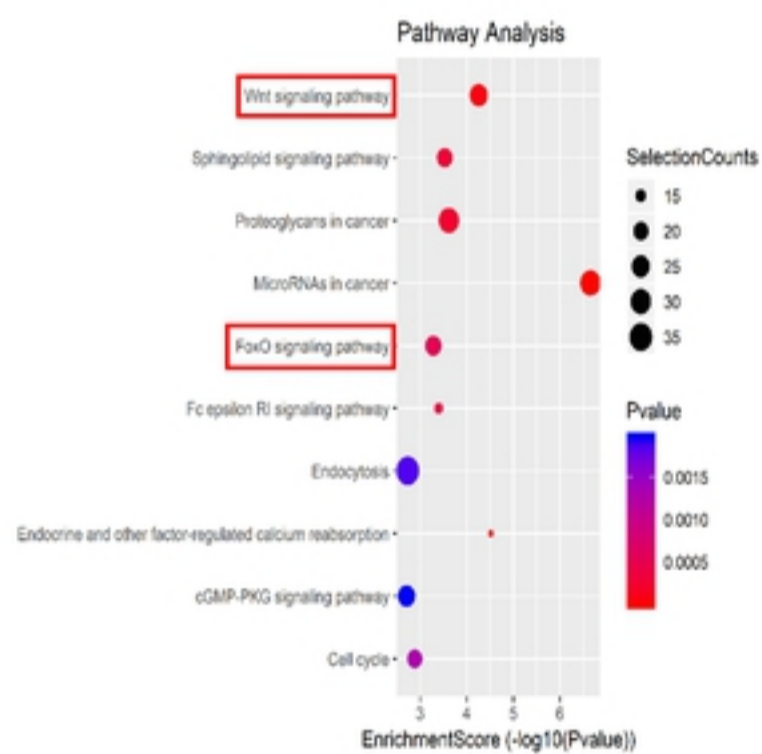

**E Methy.down & exp.down**

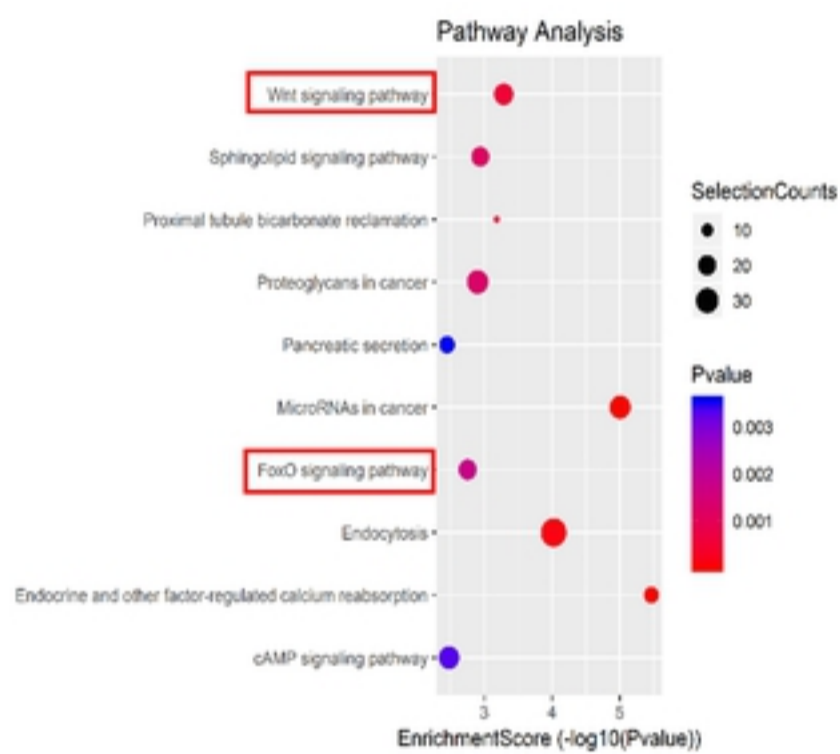

**F Methy.up & exp.up**

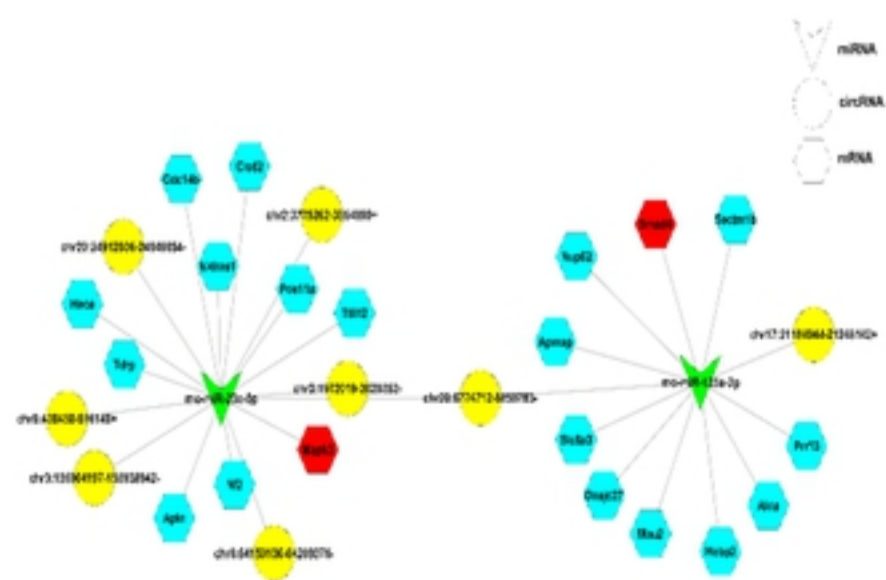

**G Methy.down & exp.down**

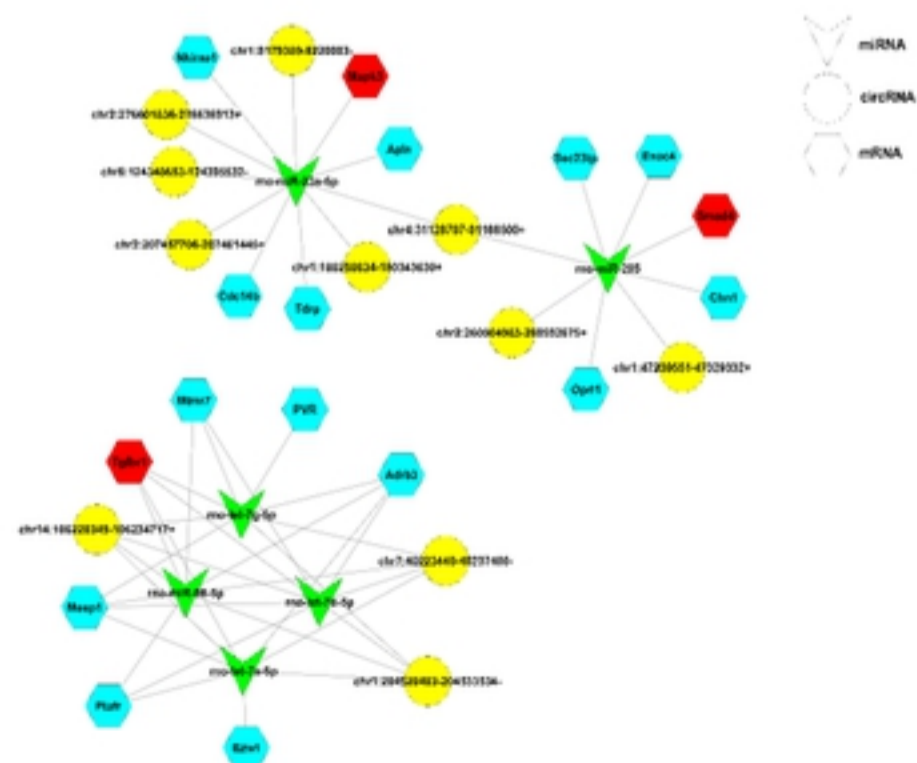

Figure 5

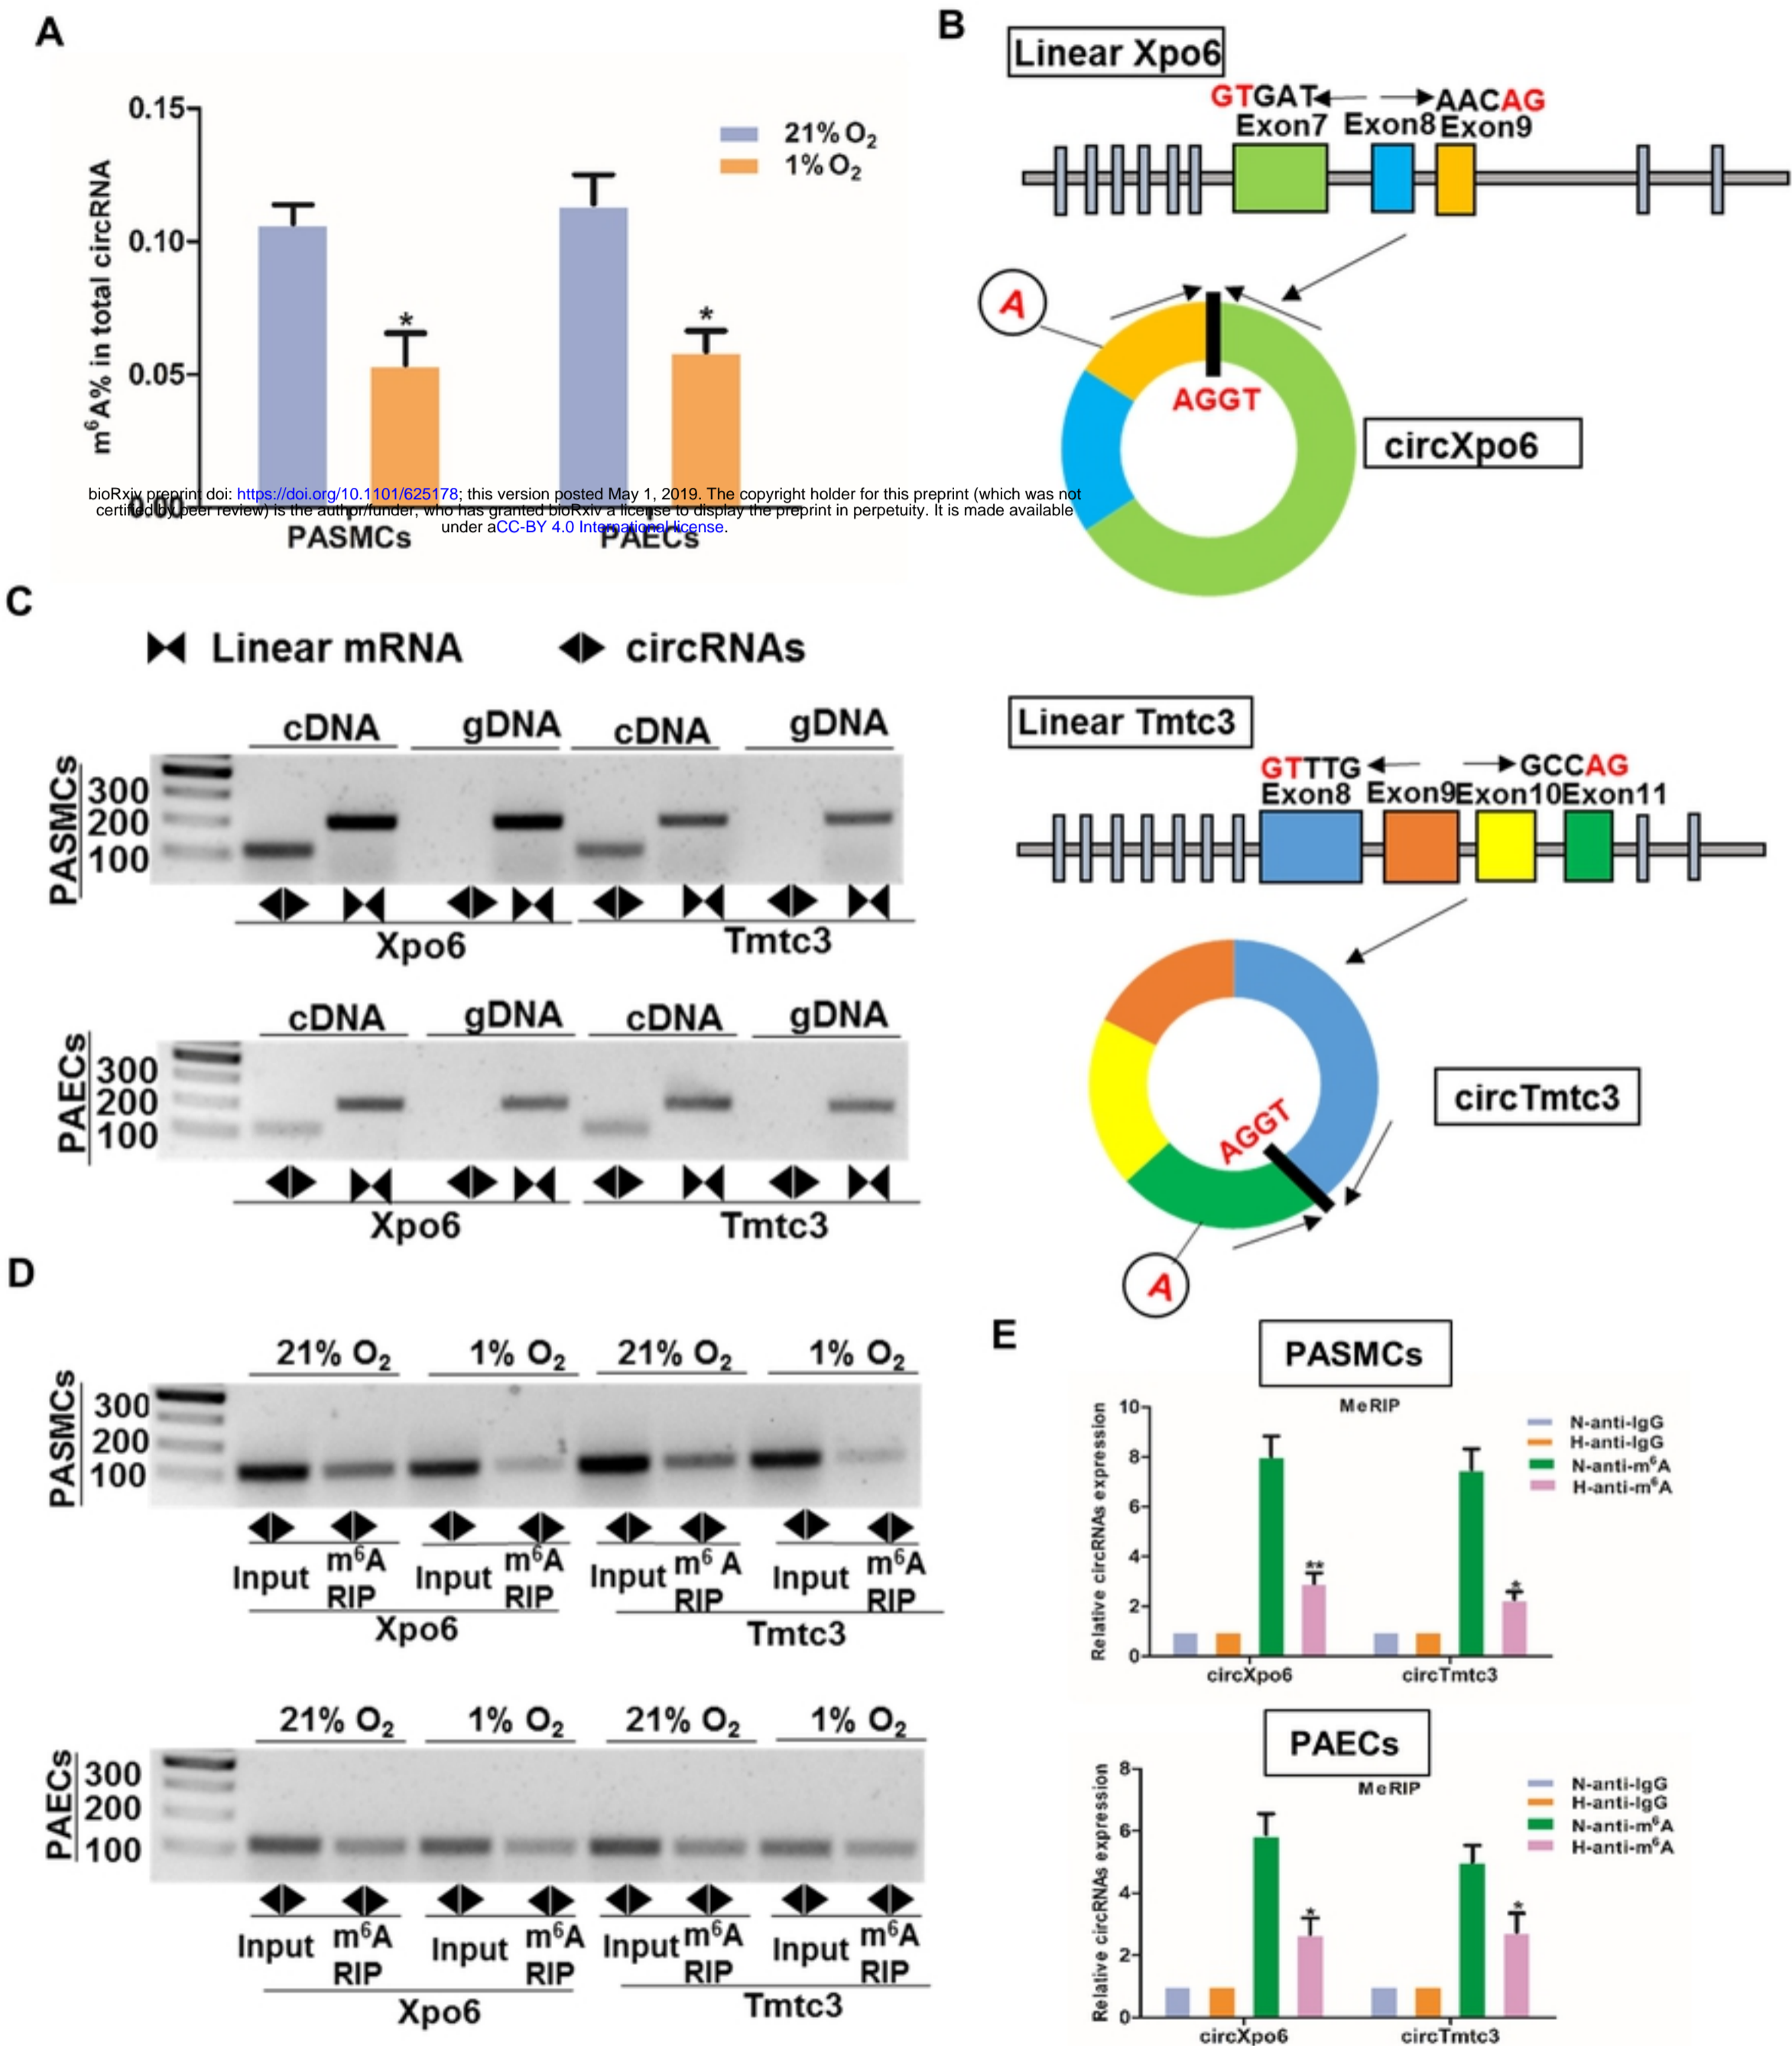

Figure 6

bioRxiv preprint doi: <https://doi.org/10.1101/625178>; this version posted May 1, 2019. The copyright holder for this preprint (which was not certified by peer review) is the author/funder, who has granted bioRxiv a license to display the preprint in perpetuity. It is made available under aCC-BY 4.0 International license.
